# Supplementary material for: Estimating Dementia Risk Using Multifactorial Prediction Models
Source: PubMed Central journal article supplement (PMC10265307; doi:10.1001/jamanetworkopen.2023.18132), 2023-06-13
Supplement: jamanetwopen-e2318132-s001.pdf [file jamanetwopen-e2318132-s001.pdf]

## Supplemental Online Content

Kivimäki M, Livingston G, Singh-Manoux A, et al. Estimating dementia risk using multifactorial prediction models. *JAMA Netw Open*. 2023;6(6):e2318132. doi:10.1001/jamanetworkopen.2023.18132

### **eMethods.**

**eTable 1.** Proportion of Missing Data for Each Risk Score Item

**eTable 2.** Associations Between Dementia Risk Scores and Dementia Incidence

**eTable 3.** Capacity of Dementia Risk Scores and Age Only to Estimate 10-Year Dementia Risk

**eTable 4.** Capacity of Dementia Risk Scores and Age Only to Estimate 10-Year Dementia Risk Among Participants Aged  $\leq 64$  Years

**eTable 5.** Capacity of Dementia Risk Scores and Age Only to Estimate 10-Year Dementia Risk Among Participants Aged 65 Years or Older

**eTable 6.** Capacity of Dementia Risk Scores and Age Only to Estimate 10-Year Dementia Risk in All Participants Including Those with Follow-up Less Than 365 Days

**eTable 7.** Performance of Dementia Risk Scores and Age Only to Estimate 10-Year Dementia Risk at Age 65 ( $\pm 1$ ) Years

**eTable 8.** Capacity of Dementia Risk Scores and Age Only to Estimate 20-Year Dementia Risk in the Whitehall II Study

This supplemental material has been provided by the authors to give readers additional information about their work.

## Measurement of Dementia Risk Scores

Baseline assessment included all factors in the CAIDE, BDSI and ANU-ADRI scores,<sup>1-4</sup> measured according to standard operating protocols: Age group at recruitment; sex; educational qualifications (converted to years of education); systolic blood pressure (mmHg, automated reading supplemented by manual reading by a trained nurse in UK Biobank and measured with an OMRON HEM 907 machine in the Whitehall II study after 5 minutes of rest); weight (kg); standing height (cm), serum total cholesterol (using an enzymatic assay on a Beckman Coulter AU5800 in UK Biobank and the CHOD-PAP method in the Whitehall II study), physical activity (times per week for CAIDE; weekly metabolic equivalent minutes, converted to International Physical Activity Questionnaire activity groups for ANU-ADRI), diabetes (self-reported diabetes or insulin medication or serum glycated haemoglobin [HbA1c, measured using High Performance Liquid Chromatography]  $\geq 48$  mmol/mol), mention of stroke in hospital records (ICD-10 codes I60; I61, I63, I64), need of help from others to manage money or medications (self-reported attendance allowance used as a proxy), self-report of recent symptoms of depression (depressed mood, unenthusiasm/disinterest, or tiredness/lethargy), mention of traumatic brain injury in hospital records (ICD-10 code S06), self-report of smoking, alcohol intake, social engagement (relationship status, participation in pub or social club, frequency of friends/family visits, the existence of a confidant relationship and number of living in household apart from spouse), cognitive activity (adult education class, attending a religious group or other group activity), fish intake and occupational pesticide exposure. In UK Biobank, *APOE* genotype was obtained by Affymetrix using a bespoke BiLEVE Axiom array or the UK Biobank Axiom array and was quality controlled by the Wellcome Trust Centre for Human Genetics (WTCHG), University of Oxford, before release into UK Biobank. In the Whitehall II study, *APOE* genotype was determined using a standard PCR assay (heteroduplex generator) of DNA extracted from whole blood using the salting-out method.<sup>5</sup> *APOE* genotype was directly genotyped based on two SNPs (rs7412 and rs429358). *APOE4+* dominant model of E2/E4, E3/E4 and E4/E4 was used to define the presence of *APOE4*. None of the risk scores included questions on use of antihypertensive or lipid-lowering medications and the only antidiabetic pharmacotherapy requested was insulin treatment.

Linear combinations to determine dementia risk scores are as follows:

The CAIDE score (Clinical version) = age (<47 = 0 points, 47-53 = 3 points, >53 = 4 points) + years of education ( $\geq 10$  = 0 points; 7-9 = 2 points, 0-6 = 3 points) + sex (female = 0 points, male = 1 point) + systolic blood pressure ( $\leq 140$ mmHg = 0 point, >140mmHg = 2 points) + BMI ( $\leq 30$  = 0 points, >30 = 2 points) + total cholesterol ( $\leq 6.5$ mmol/l = 0 points, >6.5mmol/l = 2 points) + physical activity (active = 0 points, inactive = 1 point). Range 0-15

The CAIDE score (APOE supplemented) = Age (<47 = 0 points, 47-53 = 3 points, >53 = 5 points) + Years of education ( $\geq 10$  = 0 points; 7-9 = 3 points, 0-6 = 4 points) + Sex (female = 0 points, male = 1 point) + Systolic blood pressure ( $\leq 140$ mmHg = 0 point, >140mmHg = 2 points) + BMI ( $\leq 30$  = 0 points, >30 = 2 points) + Total cholesterol ( $\leq 6.5$ mmol/l = 0 points, >6.5mmol/l = 1 points) + Physical activity (active = 0 points, inactive = 1 point) + APOE4 genotype (non epsilon-4 = 0 points, epsilon4 = 2 points). Range 0-18.

The BDSI = Age (1 point per year above age 65 until age 79) + Years of education ( $\geq 12$  = 0 points, <12 = 9 points) + BMI ( $\geq 18.5$  = 0 points, <18.5 = 8 points) + Diabetes (no = 0 points, yes = 3 points) + Stroke (no = 0 points, yes = 6 points) + Help from others to manage money or medications (no = 0 point, yes = 10) + Symptoms of depression (no = 0, yes = 6). Range 0-56.

The ANU-ADRI = Age (for males: <65 = 0 points, 65-69 = 1 point, 70-74 = 12 points, 75-79 = 18 points, 80-84 = 26 points, 85-90 = 33 points, >90 = 38 points; for females: <65 = 0 points, 65-69 = 5 points, 70-74 = 14 points, 75-79 = 21 points, 80-84 = 29 points, 85-90 = 35 points, >90 = 41 points) + Education (>11 years = 0 points, 8-11 years = 3 points, <8 years = 6 points) + BMI (if age <60, <25 = 0 points, 25- <30 = 2 points, ≥30 = 5 points) + diabetes (no = 0 points, yes = 3 points) + symptoms of depression (no = 0 points, yes = 2 points) + total cholesterol (if age <60, <6.2mmol/l = 0 points, ≥6.2mmol/l = 3 points) + traumatic brain injury (no = 0 points, yes = 4 points) + smoking (never = 0 points, past = 1 point, current = 4 points) + alcohol intake (non-drinker = 0 points, drinker = -3 points) + social engagement (high = 0 points, medium to high = 1 point, low to medium = 4 points, low = 6 points) + physical activity (IPAQ-low = 0 points, IPAQ-moderate = -2 points, IPAQ-high = -3 points) + Cognitive activity (low = 0 points, medium = -7 points [sic], high = -6 points [sic]) + fish intake (<0.25 portions/week = 0 points, 0.25 - <2 portions/week = -3 points, 2-4 portions/week = -4 points, >4 portions/week = -5 points) + occupational pesticide exposure (rarely or never = 0 points, more often = 2 points). Range -18 – 114.

### Ascertainment of Dementia

Dementia was ascertained using primary and secondary diagnoses from linked hospital admission data from Hospital Episode Statistics–Admitted Patient Care (HES APC England), SMR01 (Scottish Morbidity Records–General/Acute Inpatient and Day Case Admissions [Scotland]) and PEDW (Patient Episode Database for Wales) and from underlying/contributory causes of death being dementia. A diagnosis of all-cause dementia consisted of the following International Classification of Diseases, 10th Revision (ICD-10) codes: F00–F03, F05.1, G30, G31.0, G31.1, and G31.8.<sup>6</sup> In addition, we considered the following subtypes of dementia: Alzheimer’s disease (F00, G30), vascular dementia (F01), frontotemporal dementia (F02.0, G31.0), and Parkinson’s disease dementia (F02.3).<sup>6</sup> In the Whitehall II study, only 3-digit codes for dementia diagnosis were available: F00-F03, G30, G31.

### Assessment of clinical value

To evaluate the score’s clinical value and ability to detect those who would develop dementia, we dichotomized the risk scores into ‘test positive’ versus ‘test negative’ using alternative cut-offs. For each risk score, we calculated detection rate (the proportion of incident dementia cases who were test positive, also known as sensitivity), false positive rate (the proportion of non-dementia cases who nevertheless were test positive, which equals to 1 - specificity), the number of dementia cases missed per 10 cases, and the ratio of true to false positives (also referred to as the odds of being affected given a positive result [OAPR]). The formulas were as follows:

$$\begin{aligned} \text{Detection rate} &= a/(a+c) \\ \text{Number missed per 10 cases} &= c/(a + c) * 10 \\ \text{False positive rate} &= b/(b+d) \\ \text{Ratio true-to-false positives} &= a/b, \text{ expressed as } 1\text{-to-}(b/a), \end{aligned}$$

where a, b, c and d represent different combinations of risk scores and incident dementia as defined below:

| RISK SCORE    | DEMENTIA DURING THE FOLLOW-UP |    |
|---------------|-------------------------------|----|
|               | Yes                           | No |
| Test positive | a                             | b  |
| Test negative | c                             | d  |

## References

1. Sindi S, Calov E, Fokkens J, et al. The CAIDE Dementia Risk Score App: The development of an evidence-based mobile application to predict the risk of dementia. *Alzheimers Dement (Amst)* 2015;1(3):328-33.
2. Barnes DE, Beiser AS, Lee A, et al. Development and validation of a brief dementia screening indicator for primary care. *Alzheimer's & dementia : the journal of the Alzheimer's Association* 2014;10(6):656-65.
3. Anstey KJ, Cherbuin N, Herath PM, et al. A self-report risk index to predict occurrence of dementia in three independent cohorts of older adults: the ANU-ADRI. *PLoS One* 2014;9(1):e86141.
4. Kivipelto M, Ngandu T, Laatikainen T, et al. Risk score for the prediction of dementia risk in 20 years among middle aged people: a longitudinal, population-based study. *The Lancet Neurology* 2006;5(9):735-41.
5. Miller SA, Dykes DD, Polesky HF. A simple salting out procedure for extracting DNA from human nucleated cells. *Nucleic Acids Res* 1988;16(3):1215.
6. Sipilä PN, Heikkilä N, Lindbohm JV, et al. Hospital-treated infectious diseases and the risk of dementia: a large, multicohort, observational study with a replication cohort. *Lancet Infectious Diseases* 2021;21(11):1557-67.

**eTable 1. Proportion of Missing Data for Each Risk Score Item**

| <b>Variable</b>                                                     | <b>N (%)</b>     |
|---------------------------------------------------------------------|------------------|
| Age at entry, years                                                 |                  |
| Available                                                           | >502383 (100.0%) |
| Missing                                                             | <5 (0.0%)        |
| Sex                                                                 |                  |
| Available                                                           | 502388 (100.0%)  |
| Ethnicity                                                           |                  |
| Available                                                           | 499609 (99.4%)   |
| Missing                                                             | 2779 (0.6%)      |
| Education, years                                                    |                  |
| Available                                                           | 492256 (98.0%)   |
| Missing                                                             | 10132 (2.0%)     |
| Systolic blood pressure                                             |                  |
| Available                                                           | 500554 (99.6%)   |
| Missing                                                             | 1834 (0.4%)      |
| Body mass index                                                     |                  |
| Available                                                           | 499281 (99.4%)   |
| Missing                                                             | 3107 (0.6%)      |
| Total cholesterol                                                   |                  |
| Available                                                           | 469480 (93.4%)   |
| Missing                                                             | 32908 (6.6%)     |
| Physical activity, times per week                                   |                  |
| Available                                                           | 474813 (94.5%)   |
| Missing                                                             | 27575 (5.5%)     |
| Physical activity, IPAQ group                                       |                  |
| Available                                                           | 402283 (80.1%)   |
| Missing                                                             | 100105 (19.9%)   |
| APOE4 carrier                                                       |                  |
| Available                                                           | 413037 (82.2%)   |
| Missing                                                             | 89351 (17.8%)    |
| Diabetes mellitus                                                   |                  |
| Available                                                           | 468501 (93.3%)   |
| Missing                                                             | 33887 (6.7%)     |
| History of stroke                                                   |                  |
| Available                                                           | 502388 (100.0%)  |
| Needs help                                                          |                  |
| Available                                                           | 496856 (98.9%)   |
| Missing                                                             | 5532 (1.1%)      |
| Depressive symptoms                                                 |                  |
| Available                                                           | 466469 (92.9%)   |
| Missing                                                             | 35919 (7.1%)     |
| History of traumatic brain injury                                   |                  |
| Available                                                           | 502388 (100.0%)  |
| Smoking status                                                      |                  |
| Available                                                           | 499438 (99.4%)   |
| Missing                                                             | 2950 (0.6%)      |
| Alcohol drinking                                                    |                  |
| Available                                                           | 500886 (99.7%)   |
| Missing                                                             | 1502 (0.3%)      |
| Social engagement                                                   |                  |
| Available                                                           | 477212 (95.0%)   |
| Missing                                                             | 25176 (5.0%)     |
| Cognitive activity                                                  |                  |
| Available                                                           | 499553 (99.4%)   |
| Missing                                                             | 2835 (0.6%)      |
| Fish intake                                                         |                  |
| Available                                                           | 496638 (98.9%)   |
| Missing                                                             | 5750 (1.1%)      |
| Occupational pesticide exposure                                     |                  |
| Available                                                           | 502388 (100.0%)  |
| Abbreviations: IPAQ, International Physical Activity Questionnaire. |                  |

**eTable 2. Associations Between Dementia Risk Scores and Dementia Incidence**

| Risk score                         | Quintile    | Range      | N      | N dementia (%) | HR (95% CI)            |
|------------------------------------|-------------|------------|--------|----------------|------------------------|
| CAIDE Score<br>(Clinical version)  | 1st         | 0 to 4     | 109105 | 130 (0.1)      | 1 (reference)          |
|                                    | 2nd         | 5 to 6     | 113225 | 683 (0.6)      | 5.14 (4.26 to 6.20)    |
|                                    | 3rd         | 7          | 68017  | 611 (0.9)      | 7.72 (6.39 to 9.33)    |
|                                    | 4th         | 8 to 9     | 94527  | 994 (1.1)      | 9.12 (7.60 to 10.95)   |
|                                    | 5th         | 10 to 14   | 43537  | 560 (1.3)      | 11.38 (9.40 to 13.77)  |
| CAIDE Score<br>(APOE supplemented) | 1st         | 0 to 5     | 95944  | 76 (0.08)      | 1 (reference)          |
|                                    | 2nd         | 6 to 7     | 83368  | 345 (0.4)      | 5.29 (4.13 to 6.79)    |
|                                    | 3rd         | 8          | 49577  | 377 (0.8)      | 9.80 (7.66 to 12.54)   |
|                                    | 4th         | 9 to 10    | 72687  | 747 (1.0)      | 13.37 (10.56 to 16.93) |
|                                    | 5th         | 11 to 17   | 57540  | 957 (1.7)      | 22.03 (17.44 to 27.83) |
| BDSI                               | 1st and 2nd | 0          | 199139 | 530 (0.3)      | 1 (reference)          |
|                                    | 3rd         | 1 to 6     | 70921  | 712 (1.0)      | 3.85 (3.44 to 4.31)    |
|                                    | 4th         | 7 to 9     | 86076  | 506 (0.6)      | 2.23 (1.97 to 2.52)    |
|                                    | 5th         | 10 to 42   | 61432  | 1207 (2.0)     | 7.76 (7.00 to 8.59)    |
| ANU-ADRI                           | 1st         | -18 to -10 | 66912  | 329 (0.5)      | 1 (reference)          |
|                                    | 2nd         | -9 to -6   | 77640  | 410 (0.5)      | 1.07 (0.93 to 1.24)    |
|                                    | 3rd         | -5 to -3   | 63580  | 373 (0.6)      | 1.20 (1.03 to 1.39)    |
|                                    | 4th         | -2 to 1    | 65237  | 432 (0.7)      | 1.36 (1.18 to 1.57)    |
|                                    | 5th         | 2 to 28    | 53685  | 635 (1.2)      | 2.48 (2.17 to 2.83)    |
| Age only                           | 1st         | 38 to 48   | 96303  | 50 (0.05)      | 1 (reference)          |
|                                    | 2nd         | 49 to 55   | 99868  | 169 (0.2)      | 3.29 (2.40 to 4.51)    |
|                                    | 3rd         | 56 to 60   | 91340  | 353 (0.4)      | 7.59 (5.64 to 10.20)   |
|                                    | 4th         | 61 to 64   | 90169  | 845 (0.9)      | 18.57 (13.96 to 24.70) |
|                                    | 5th         | 65 to 73   | 88249  | 2004 (2.3)     | 46.33 (34.99 to 61.34) |

Abbreviations: ANU-ADRI, the Australian National University Alzheimer's Disease Risk Index; BDSI, the Brief Dementia Screening Indicator; CAIDE Score, the Cardiovascular Risk Factors, Aging, and Dementia Score; CI, confidence interval; HR, hazard ratio.

**eTable 3. Capacity of Dementia Risk Scores and Age Only to Estimate 10-Year Dementia Risk**

| Risk score                         | Observed range | Alternative cut offs | Dementia |          | No dementia |          | Detection rate | Number missed per 10 cases | False positive rate | Ratio true-to-false positives |
|------------------------------------|----------------|----------------------|----------|----------|-------------|----------|----------------|----------------------------|---------------------|-------------------------------|
|                                    |                |                      | Test pos | Test neg | Test pos    | Test neg |                |                            |                     |                               |
| CAIDE Score<br>(Clinical version)  | 0 to 14        | 0-5 vs ≥6            | 2522     | 456      | 263 517     | 161 916  | 0.85           | 1.5                        | 0.62                | 1 to 104                      |
|                                    |                | 0-6 vs ≥7            | 2165     | 813      | 203 916     | 221 517  | 0.73           | 2.7                        | 0.48                | 1 to 94                       |
|                                    |                | 0-7 vs ≥8            | 1554     | 1424     | 136 510     | 288 923  | 0.52           | 4.8                        | 0.32                | 1 to 88                       |
|                                    |                | 0-8 vs ≥9*           | 1009     | 1969     | 85 349      | 340 084  | 0.34           | 6.6                        | 0.20                | 1 to 85                       |
|                                    |                | 0-9 vs ≥10*          | 560      | 2418     | 42 977      | 382 456  | 0.19           | 8.1                        | 0.10                | 1 to 77                       |
|                                    |                | 0-10 vs ≥11          | 268      | 2710     | 19 404      | 406 029  | 0.09           | 9.1                        | 0.05                | 1 to 72                       |
|                                    |                | 0-11 vs ≥12          | 114      | 2864     | 6 714       | 418 719  | 0.04           | 9.6                        | 0.02                | 1 to 59                       |
| CAIDE Score<br>(APOE supplemented) | 0 to 17        | 0-5 vs ≥6            | 2426     | 76       | 260 746     | 95 868   | 0.97           | 0.3                        | 0.73                | 1 to 107                      |
|                                    |                | 0-6 vs ≥7            | 2274     | 228      | 217 353     | 139 261  | 0.91           | 0.9                        | 0.61                | 1 to 96                       |
|                                    |                | 0-7 vs ≥8            | 2081     | 421      | 177 723     | 178 891  | 0.83           | 1.7                        | 0.50                | 1 to 85                       |
|                                    |                | 0-8 vs ≥9            | 1704     | 798      | 128 523     | 228 091  | 0.68           | 3.2                        | 0.36                | 1 to 75                       |
|                                    |                | 0-9 vs ≥10*          | 1307     | 1195     | 86 326      | 270 288  | 0.52           | 4.8                        | 0.24                | 1 to 66                       |
|                                    |                | 0-10 vs ≥11*         | 957      | 1545     | 56 583      | 300 031  | 0.38           | 6.2                        | 0.16                | 1 to 59                       |
|                                    |                | 0-11 vs ≥12          | 593      | 1909     | 29 979      | 326 635  | 0.24           | 7.6                        | 0.08                | 1 to 51                       |
|                                    |                | 0-12 vs ≥13          | 399      | 2103     | 16 487      | 340 127  | 0.16           | 8.4                        | 0.05                | 1 to 41                       |
| BDSI                               | 0 to 42        | 0-4 vs ≥5            | 1910     | 1045     | 181 945     | 232 668  | 0.65           | 3.5                        | 0.44                | 1 to 95                       |
|                                    |                | 0-6 vs ≥7            | 1713     | 1242     | 145 795     | 268 818  | 0.58           | 4.2                        | 0.35                | 1 to 85                       |
|                                    |                | 0-8 vs ≥9            | 1636     | 1319     | 142 900     | 271 713  | 0.55           | 4.5                        | 0.34                | 1 to 87                       |
|                                    |                | 0-9 vs ≥10           | 1207     | 1748     | 60 225      | 354 388  | 0.41           | 5.9                        | 0.15                | 1 to 50                       |
|                                    |                | 0-14 vs ≥15          | 541      | 2414     | 31 463      | 383 150  | 0.18           | 8.2                        | 0.08                | 1 to 58                       |
|                                    |                | 0-15 vs ≥16          | 362      | 2593     | 10 026      | 404 587  | 0.12           | 8.8                        | 0.02                | 1 to 28                       |
|                                    |                | 0-21 vs ≥22*         | 96       | 2859     | 1 615       | 412 998  | 0.03           | 9.7                        | 0.004               | 1 to 17                       |
| ANU-ADRI                           | -18 to 28      | ≤-11 vs ≥-10         | 1917     | 262      | 271 328     | 53 547   | 0.88           | 1.2                        | 0.84                | 1 to 142                      |
|                                    |                | ≤-6 vs ≥-5           | 1440     | 739      | 181 062     | 143 813  | 0.66           | 3.4                        | 0.56                | 1 to 126                      |
|                                    |                | ≤-4 vs ≥-3           | 1192     | 987      | 138 608     | 186 267  | 0.55           | 4.5                        | 0.43                | 1 to 116                      |
|                                    |                | ≤-3 vs ≥-2           | 1067     | 1112     | 117 855     | 207 020  | 0.49           | 5.1                        | 0.36                | 1 to 110                      |
|                                    |                | ≤0 vs ≥1             | 721      | 1458     | 66 024      | 258 851  | 0.33           | 6.7                        | 0.20                | 1 to 92                       |
|                                    |                | ≤4 vs ≥5             | 375      | 1804     | 24 679      | 300 196  | 0.17           | 8.3                        | 0.08                | 1 to 66                       |
|                                    |                | ≤5 vs ≥6             | 293      | 1886     | 18 797      | 306 078  | 0.13           | 8.7                        | 0.06                | 1 to 64                       |
|                                    |                | ≤6 vs ≥7             | 229      | 1950     | 13 888      | 310 987  | 0.11           | 8.9                        | 0.04                | 1 to 61                       |
|                                    |                | ≤9 vs ≥10            | 117      | 2062     | 5 291       | 319 584  | 0.05           | 9.5                        | 0.02                | 1 to 45                       |
| Age only                           | 38 to 73       | ≤49 vs ≥50           | 3363     | 58       | 353 101     | 109 407  | 0.98           | 0.2                        | 0.76                | 1 to 105                      |
|                                    |                | ≤54 vs ≥55           | 3239     | 182      | 282 204     | 180 304  | 0.95           | 0.5                        | 0.61                | 1 to 87                       |
|                                    |                | ≤59 vs ≥60           | 2952     | 469      | 198 199     | 264 309  | 0.86           | 1.4                        | 0.43                | 1 to 67                       |
|                                    |                | ≤63 vs ≥64           | 2312     | 1109     | 106 715     | 355 793  | 0.68           | 3.2                        | 0.23                | 1 to 46                       |
|                                    |                | ≤64 vs ≥65           | 2004     | 1417     | 86 245      | 376 263  | 0.59           | 4.1                        | 0.19                | 1 to 43                       |
|                                    |                | ≤65 vs ≥66           | 1693     | 1728     | 66 095      | 396 413  | 0.49           | 5.1                        | 0.14                | 1 to 39                       |
|                                    |                | ≤66 vs ≥67           | 1330     | 2091     | 47 825      | 414 683  | 0.39           | 6.1                        | 0.10                | 1 to 36                       |
|                                    |                | ≤67 vs ≥68           | 958      | 2463     | 31 381      | 431 127  | 0.28           | 7.2                        | 0.07                | 1 to 33                       |
|                                    |                | ≤68 vs ≥69           | 549      | 2872     | 16 401      | 446 107  | 0.16           | 8.4                        | 0.04                | 1 to 30                       |
|                                    |                | ≤69 vs ≥70           | 85       | 3336     | 2 173       | 460 335  | 0.02           | 9.8                        | 0.005               | 1 to 26                       |

Abbreviations: ANU-ADRI, the Australian National University Alzheimer's Disease Risk Index; BDSI, the Brief Dementia Screening Indicator; CAIDE Score, the Cardiovascular Risk Factors, Aging, and Dementia Score.  
\*Cut offs recommended in literature.

**eTable 4. Capacity of Dementia Risk Scores and Age Only to Estimate 10-Year Dementia Risk Among Participants Aged ≤64 Years**

| Risk score                      | Observed range | C-index (95% CI)    | Alternative cut offs | Dementia |          | No dementia |          | Detection rate | Number missed per 10 cases | False positive rate | Ratio true-to-false positives |
|---------------------------------|----------------|---------------------|----------------------|----------|----------|-------------|----------|----------------|----------------------------|---------------------|-------------------------------|
|                                 |                |                     |                      | Test pos | Test neg | Test pos    | Test neg |                |                            |                     |                               |
| CAIDE Score (Clinical version)  | 0 to 14        | 0.66 (0.65 to 0.68) | 0-5 vs ≥6            | 994      | 254      | 196 624     | 151 370  | 0.80           | 2.0                        | 0.57                | 1 to 198                      |
|                                 |                |                     | 0-6 vs ≥7            | 821      | 427      | 147 268     | 200 726  | 0.66           | 3.4                        | 0.42                | 1 to 179                      |
|                                 |                |                     | 0-7 vs ≥8            | 581      | 667      | 96 211      | 251 783  | 0.47           | 5.3                        | 0.28                | 1 to 166                      |
|                                 |                |                     | 0-8 vs ≥9*           | 369      | 879      | 58 622      | 289 372  | 0.30           | 7.0                        | 0.17                | 1 to 159                      |
|                                 |                |                     | 0-9 vs ≥10*          | 204      | 1044     | 28 780      | 319 214  | 0.16           | 8.4                        | 0.08                | 1 to 141                      |
|                                 |                |                     | 0-10 vs ≥11          | 80       | 1168     | 12 700      | 335 294  | 0.06           | 9.4                        | 0.04                | 1 to 159                      |
|                                 |                |                     | 0-11 vs ≥12          | 34       | 1214     | 4 305       | 343 689  | 0.03           | 9.7                        | 0.01                | 1 to 127                      |
| CAIDE Score (APOE supplemented) | 0 to 17        | 0.71 (0.70 to 0.73) | 0-5 vs ≥6            | 981      | 58       | 198 056     | 93 939   | 0.94           | 0.6                        | 0.68                | 1 to 202                      |
|                                 |                |                     | 0-6 vs ≥7            | 890      | 149      | 160 184     | 131 811  | 0.86           | 1.4                        | 0.55                | 1 to 180                      |
|                                 |                |                     | 0-7 vs ≥8            | 792      | 247      | 127 375     | 164 620  | 0.76           | 2.4                        | 0.44                | 1 to 161                      |
|                                 |                |                     | 0-8 vs ≥9            | 618      | 421      | 89 521      | 202 474  | 0.59           | 4.1                        | 0.31                | 1 to 145                      |
|                                 |                |                     | 0-9 vs ≥10*          | 441      | 598      | 57 934      | 234 061  | 0.42           | 5.8                        | 0.20                | 1 to 131                      |
|                                 |                |                     | 0-10 vs ≥11*         | 315      | 724      | 36 612      | 255 383  | 0.30           | 7.0                        | 0.13                | 1 to 116                      |
|                                 |                |                     | 0-11 vs ≥12          | 188      | 851      | 18 670      | 273 325  | 0.18           | 8.2                        | 0.06                | 1 to 99                       |
|                                 |                |                     | 0-12 vs ≥13          | 120      | 919      | 9 985       | 282 010  | 0.12           | 8.8                        | 0.03                | 1 to 83                       |
| BDSI                            | 0 to 42        | 0.62 (0.60 to 0.64) | 0-13 vs ≥14          | 58       | 981      | 4 375       | 287 620  | 0.06           | 9.4                        | 0.01                | 1 to 75                       |
|                                 |                |                     | 0-4 vs ≥5            | 722      | 502      | 139 426     | 198 387  | 0.59           | 4.1                        | 0.41                | 1 to 193                      |
|                                 |                |                     | 0-6 vs ≥7            | 600      | 624      | 105 940     | 231 873  | 0.49           | 5.1                        | 0.31                | 1 to 177                      |
|                                 |                |                     | 0-8 vs ≥9            | 597      | 627      | 104 979     | 232 834  | 0.49           | 5.1                        | 0.31                | 1 to 176                      |
|                                 |                |                     | 0-9 vs ≥10           | 271      | 953      | 29 166      | 308 647  | 0.22           | 7.8                        | 0.09                | 1 to 108                      |
|                                 |                |                     | 0-14 vs ≥15          | 214      | 1010     | 24 125      | 313 688  | 0.17           | 8.3                        | 0.07                | 1 to 113                      |
|                                 |                |                     | 0-15 vs ≥16          | 79       | 1145     | 4 231       | 333 582  | 0.06           | 9.4                        | 0.01                | 1 to 54                       |
| ANU-ADRI                        | -18 to 26      | 0.56 (0.54 to 0.58) | 0-21 vs ≥22*         | 27       | 1197     | 828         | 336 985  | 0.02           | 9.8                        | 0.002               | 1 to 31                       |
|                                 |                |                     | ≤-11 vs ≥-10         | 770      | 139      | 218 968     | 46 719   | 0.85           | 1.5                        | 0.82                | 1 to 284                      |
|                                 |                |                     | ≤-6 vs ≥-5           | 557      | 352      | 144 540     | 121 147  | 0.61           | 3.9                        | 0.54                | 1 to 259                      |
|                                 |                |                     | ≤-4 vs ≥-3           | 455      | 454      | 109 229     | 156 458  | 0.50           | 5.0                        | 0.41                | 1 to 240                      |
|                                 |                |                     | ≤-3 vs ≥-2           | 402      | 507      | 92 064      | 173 623  | 0.44           | 5.6                        | 0.35                | 1 to 229                      |
|                                 |                |                     | ≤0 vs ≥1             | 260      | 649      | 50 222      | 215 465  | 0.29           | 7.1                        | 0.19                | 1 to 193                      |
|                                 |                |                     | ≤4 vs ≥5             | 124      | 785      | 17 941      | 247 746  | 0.14           | 8.6                        | 0.07                | 1 to 145                      |
|                                 |                |                     | ≤5 vs ≥6             | 89       | 820      | 13 591      | 252 096  | 0.10           | 9.0                        | 0.05                | 1 to 153                      |
|                                 |                |                     | ≤6 vs ≥7             | 66       | 843      | 9 969       | 255 718  | 0.07           | 9.3                        | 0.04                | 1 to 151                      |
|                                 |                |                     | ≤9 vs ≥10            | 34       | 875      | 3 723       | 261 964  | 0.04           | 9.6                        | 0.01                | 1 to 110                      |
| Age only                        | 38 to 64       | 0.75 (0.74 to 0.77) | ≤49 vs ≥50           | 1359     | 58       | 266 856     | 109 407  | 0.96           | 0.4                        | 0.71                | 1 to 196                      |
|                                 |                |                     | ≤54 vs ≥55           | 1235     | 182      | 195 959     | 180 304  | 0.87           | 1.3                        | 0.52                | 1 to 159                      |
|                                 |                |                     | ≤59 vs ≥60           | 948      | 469      | 111 954     | 264 309  | 0.67           | 3.3                        | 0.30                | 1 to 118                      |
|                                 |                |                     | ≤63 vs ≥64           | 308      | 1109     | 20 470      | 355 793  | 0.22           | 7.8                        | 0.05                | 1 to 66                       |

Abbreviations: ANU-ADRI, the Australian National University Alzheimer's Disease Risk Index; BDSI, the Brief Dementia Screening Indicator; CAIDE, the Cardiovascular Risk Factors, Aging, and Incidence of Dementia Score; CI, confidence interval.

\*Cut offs recommended in literature.

**eTable 5. Capacity of Dementia Risk Scores and Age Only to Estimate 10-Year Dementia Risk Among Participants Aged 65 Years or Older**

| Risk score                      | Observed range | C-index (95% CI)    | Alternative cut offs | Dementia |          | No dementia |          | Detection rate | Number missed per 10 cases | False positive rate | Ratio true-to-false positives |
|---------------------------------|----------------|---------------------|----------------------|----------|----------|-------------|----------|----------------|----------------------------|---------------------|-------------------------------|
|                                 |                |                     |                      | Test pos | Test neg | Test pos    | Test neg |                |                            |                     |                               |
| CAIDE Score (Clinical version)  | 4 to 14        | 0.53 (0.51 to 0.54) | 0-5 vs ≥6            | 1528     | 202      | 66 893      | 10 546   | 0.88           | 1.2                        | 0.86                | 1 to 44                       |
|                                 |                |                     | 0-6 vs ≥7            | 1344     | 386      | 56 648      | 20 791   | 0.78           | 2.2                        | 0.73                | 1 to 42                       |
|                                 |                |                     | 0-7 vs ≥8            | 973      | 757      | 40 299      | 37 140   | 0.56           | 4.4                        | 0.52                | 1 to 41                       |
|                                 |                |                     | 0-8 vs ≥9*           | 640      | 1090     | 26 727      | 50 712   | 0.37           | 6.3                        | 0.35                | 1 to 42                       |
|                                 |                |                     | 0-9 vs ≥10*          | 356      | 1374     | 14 197      | 63 242   | 0.21           | 7.9                        | 0.18                | 1 to 40                       |
|                                 |                |                     | 0-10 vs ≥11          | 188      | 1542     | 6 704       | 70 735   | 0.11           | 8.9                        | 0.09                | 1 to 36                       |
|                                 |                |                     | 0-11 vs ≥12          | 80       | 1650     | 2 409       | 75 030   | 0.05           | 9.5                        | 0.03                | 1 to 30                       |
| CAIDE Score (APOE supplemented) | 5 to 17        | 0.60 (0.59 to 0.62) | 0-5 vs ≥6            | 1445     | 18       | 62 690      | 1 929    | 0.99           | 0.1                        | 0.97                | 1 to 43                       |
|                                 |                |                     | 0-6 vs ≥7            | 1384     | 79       | 57 169      | 7 450    | 0.95           | 0.5                        | 0.88                | 1 to 41                       |
|                                 |                |                     | 0-7 vs ≥8            | 1289     | 174      | 50 348      | 14 271   | 0.88           | 1.2                        | 0.78                | 1 to 39                       |
|                                 |                |                     | 0-8 vs ≥9            | 1086     | 377      | 39 002      | 25 617   | 0.74           | 2.6                        | 0.60                | 1 to 36                       |
|                                 |                |                     | 0-9 vs ≥10*          | 866      | 597      | 28 392      | 36 227   | 0.59           | 4.1                        | 0.44                | 1 to 33                       |
|                                 |                |                     | 0-10 vs ≥11*         | 642      | 821      | 19 971      | 44 648   | 0.44           | 5.6                        | 0.31                | 1 to 31                       |
|                                 |                |                     | 0-11 vs ≥12          | 405      | 1058     | 11 309      | 53 310   | 0.28           | 7.2                        | 0.18                | 1 to 28                       |
| BDSI                            | 0 to 38        | 0.61 (0.59 to 0.62) | 0-12 vs ≥13          | 279      | 1184     | 6 502       | 58 117   | 0.19           | 8.1                        | 0.10                | 1 to 23                       |
|                                 |                |                     | 0-13 vs ≥14          | 139      | 1324     | 3 047       | 61 572   | 0.10           | 9.0                        | 0.05                | 1 to 22                       |
|                                 |                |                     | 0-4 vs ≥5            | 1188     | 543      | 42 519      | 34 281   | 0.69           | 3.1                        | 0.55                | 1 to 36                       |
|                                 |                |                     | 0-6 vs ≥7            | 1163     | 568      | 41 156      | 35 644   | 0.67           | 3.3                        | 0.54                | 1 to 35                       |
|                                 |                |                     | 0-8 vs ≥9            | 936      | 795      | 31 059      | 45 741   | 0.54           | 4.6                        | 0.40                | 1 to 33                       |
|                                 |                |                     | 0-9 vs ≥10           | 327      | 1404     | 7 338       | 69 462   | 0.19           | 8.1                        | 0.10                | 1 to 22                       |
|                                 |                |                     | 0-14 vs ≥15          | 283      | 1448     | 5 795       | 71 005   | 0.16           | 8.4                        | 0.08                | 1 to 20                       |
| ANU-ADRI                        | -17 to 28      | 0.57 (0.55 to 0.58) | 0-15 vs ≥16          | 100      | 1631     | 1 438       | 75 362   | 0.06           | 9.4                        | 0.02                | 1 to 14                       |
|                                 |                |                     | 0-21 vs ≥22*         | 69       | 1662     | 787         | 76 013   | 0.04           | 9.6                        | 0.01                | 1 to 11                       |
|                                 |                |                     | ≤-11 vs ≥-10         | 1147     | 123      | 52 360      | 6 828    | 0.90           | 1.0                        | 0.88                | 1 to 46                       |
|                                 |                |                     | ≤-6 vs ≥-5           | 883      | 387      | 36 522      | 22 666   | 0.70           | 3.0                        | 0.62                | 1 to 41                       |
|                                 |                |                     | ≤-4 vs ≥-3           | 819      | 451      | 33 233      | 25 955   | 0.64           | 3.6                        | 0.56                | 1 to 41                       |
|                                 |                |                     | ≤-3 vs ≥-2           | 461      | 809      | 15 802      | 43 386   | 0.36           | 6.4                        | 0.27                | 1 to 34                       |
|                                 |                |                     | ≤0 vs ≥1             | 251      | 1019     | 6 738       | 52 450   | 0.20           | 8.0                        | 0.11                | 1 to 27                       |
| Age only                        | 65 to 73       | 0.58 (0.56 to 0.59) | ≤4 vs ≥5             | 204      | 1066     | 5 206       | 53 982   | 0.16           | 8.4                        | 0.09                | 1 to 26                       |
|                                 |                |                     | ≤5 vs ≥6             | 163      | 1107     | 3 919       | 55 269   | 0.13           | 8.7                        | 0.07                | 1 to 24                       |
|                                 |                |                     | ≤6 vs ≥7             | 83       | 1187     | 1 568       | 57 620   | 0.07           | 9.3                        | 0.03                | 1 to 19                       |
|                                 |                |                     | ≤9 vs ≥10            | 14       | 1256     | 271         | 58 917   | 0.01           | 9.9                        | 0.005               | 1 to 19                       |
|                                 |                |                     | ≤65 vs ≥66           | 1693     | 311      | 66 095      | 20 150   | 0.84           | 1.6                        | 0.77                | 1 to 39                       |
|                                 |                |                     | ≤66 vs ≥67           | 1330     | 674      | 47 825      | 38 420   | 0.66           | 3.4                        | 0.55                | 1 to 36                       |
|                                 |                |                     | ≤67 vs ≥68           | 958      | 1046     | 31 381      | 54 864   | 0.48           | 5.2                        | 0.36                | 1 to 33                       |
| ≤68 vs ≥69                      | 549            | 1455                | 16 401               | 69 844   | 0.27     | 7.3         | 0.19     | 1 to 30        |                            |                     |                               |
| ≤69 vs ≥70                      | 85             | 1919                | 2 173                | 84 072   | 0.04     | 9.6         | 0.03     | 1 to 26        |                            |                     |                               |

Abbreviations: ANU-ADRI, the Australian National University Alzheimer's Disease Risk Index; BDSI, the Brief Dementia Screening Indicator; CAIDE, the Cardiovascular Risk Factors, Aging, and Incidence of Dementia Score; CI, confidence interval.

\*Cut offs recommended in literature.

**eTable 6. Capacity of Dementia Risk Scores and Age Only to Estimate 10-Year Dementia Risk in All Participants Including Those with Follow-up Less Than 365 Days**

| Risk score                      | Observed range | C-index (95% CI)    | Alternative cut offs | Dementia |          | No dementia |          | Detection rate | Number missed per 10 cases | False positive rate | Ratio true-to-false positives |
|---------------------------------|----------------|---------------------|----------------------|----------|----------|-------------|----------|----------------|----------------------------|---------------------|-------------------------------|
|                                 |                |                     |                      | Test pos | Test neg | Test pos    | Test neg |                |                            |                     |                               |
| CAIDE Score (Clinical version)  | 0 to 14        | 0.66 (0.65 to 0.67) | 0-5 vs ≥6            | 2569     | 466      | 269 987     | 165 110  | 0.85           | 1.5                        | 0.62                | 1 to 105                      |
|                                 |                |                     | 0-6 vs ≥7            | 2205     | 830      | 209 036     | 226 061  | 0.73           | 2.7                        | 0.48                | 1 to 95                       |
|                                 |                |                     | 0-7 vs ≥8            | 1587     | 1448     | 140 098     | 294 999  | 0.52           | 4.8                        | 0.32                | 1 to 88                       |
|                                 |                |                     | 0-8 vs ≥9*           | 1030     | 2005     | 87 626      | 347 471  | 0.34           | 6.6                        | 0.20                | 1 to 85                       |
|                                 |                |                     | 0-9 vs ≥10*          | 573      | 2462     | 44 178      | 390 919  | 0.19           | 8.1                        | 0.10                | 1 to 77                       |
|                                 |                |                     | 0-10 vs ≥11          | 273      | 2762     | 19 930      | 415 167  | 0.09           | 9.1                        | 0.05                | 1 to 73                       |
| CAIDE Score (APOE supplemented) | 0 to 17        | 0.72 (0.72 to 0.73) | 0-11 vs ≥12          | 117      | 2918     | 6 914       | 428 183  | 0.04           | 9.6                        | 0.02                | 1 to 59                       |
|                                 |                |                     | 0-5 vs ≥6            | 2478     | 78       | 266 864     | 97 722   | 0.97           | 0.3                        | 0.73                | 1 to 108                      |
|                                 |                |                     | 0-6 vs ≥7            | 2326     | 230      | 222 564     | 142 022  | 0.91           | 0.9                        | 0.61                | 1 to 96                       |
|                                 |                |                     | 0-7 vs ≥8            | 2127     | 429      | 182 065     | 182 521  | 0.83           | 1.7                        | 0.50                | 1 to 86                       |
|                                 |                |                     | 0-8 vs ≥9            | 1737     | 819      | 131 763     | 232 823  | 0.68           | 3.2                        | 0.36                | 1 to 76                       |
|                                 |                |                     | 0-9 vs ≥10*          | 1334     | 1222     | 88 529      | 276 057  | 0.52           | 4.8                        | 0.24                | 1 to 66                       |
| BDSI                            | 0 to 42        | 0.68 (0.67 to 0.69) | 0-10 vs ≥11*         | 978      | 1578     | 58 017      | 306 569  | 0.38           | 6.2                        | 0.16                | 1 to 59                       |
|                                 |                |                     | 0-11 vs ≥12          | 607      | 1949     | 30 739      | 333 847  | 0.24           | 7.6                        | 0.08                | 1 to 51                       |
|                                 |                |                     | 0-12 vs ≥13          | 410      | 2146     | 16 919      | 347 667  | 0.16           | 8.4                        | 0.05                | 1 to 41                       |
|                                 |                |                     | 0-13 vs ≥14          | 206      | 2350     | 7 604       | 356 982  | 0.08           | 9.2                        | 0.02                | 1 to 37                       |
|                                 |                |                     | 0-4 vs ≥5            | 1943     | 1068     | 186 533     | 237 514  | 0.65           | 3.5                        | 0.44                | 1 to 96                       |
|                                 |                |                     | 0-6 vs ≥7            | 1745     | 1266     | 149 519     | 274 528  | 0.58           | 4.2                        | 0.35                | 1 to 86                       |
| ANU-ADRI                        | -18 to 28      | 0.59 (0.57 to 0.60) | 0-8 vs ≥9            | 1666     | 1345     | 146 566     | 277 481  | 0.55           | 4.5                        | 0.35                | 1 to 88                       |
|                                 |                |                     | 0-9 vs ≥10           | 1230     | 1781     | 61 925      | 362 122  | 0.41           | 5.9                        | 0.15                | 1 to 50                       |
|                                 |                |                     | 0-14 vs ≥15          | 557      | 2454     | 32 450      | 391 597  | 0.18           | 8.2                        | 0.08                | 1 to 58                       |
|                                 |                |                     | 0-15 vs ≥16          | 372      | 2639     | 10 392      | 413 655  | 0.12           | 8.8                        | 0.02                | 1 to 28                       |
|                                 |                |                     | 0-21 vs ≥22*         | 102      | 2909     | 1 696       | 422 351  | 0.03           | 9.7                        | 0.004               | 1 to 17                       |
|                                 |                |                     | ≤-11 vs ≥-10         | 1951     | 268      | 277 590     | 54 633   | 0.88           | 1.2                        | 0.84                | 1 to 142                      |
| Age only                        | 38 to 73       | 0.79 (0.79 to 0.80) | ≤-6 vs ≥-5           | 1465     | 754      | 185 405     | 146 818  | 0.66           | 3.4                        | 0.56                | 1 to 127                      |
|                                 |                |                     | ≤-4 vs ≥-3           | 1213     | 1006     | 142 020     | 190 203  | 0.55           | 4.5                        | 0.43                | 1 to 117                      |
|                                 |                |                     | ≤-3 vs ≥-2           | 1087     | 1132     | 120 791     | 211 432  | 0.49           | 5.1                        | 0.36                | 1 to 111                      |
|                                 |                |                     | ≤0 vs ≥1             | 735      | 1484     | 67 729      | 264 494  | 0.33           | 6.7                        | 0.20                | 1 to 92                       |
|                                 |                |                     | ≤4 vs ≥5             | 382      | 1837     | 25 360      | 306 863  | 0.17           | 8.3                        | 0.08                | 1 to 66                       |
|                                 |                |                     | ≤5 vs ≥6             | 297      | 1922     | 19 302      | 312 921  | 0.13           | 8.7                        | 0.06                | 1 to 65                       |
| Age only                        | 38 to 73       | 0.79 (0.79 to 0.80) | ≤6 vs ≥7             | 232      | 1987     | 14 256      | 317 967  | 0.10           | 9.0                        | 0.04                | 1 to 61                       |
|                                 |                |                     | ≤9 vs ≥10            | 119      | 2100     | 5 431       | 326 792  | 0.05           | 9.5                        | 0.02                | 1 to 46                       |
|                                 |                |                     | ≤49 vs ≥50           | 3424     | 63       | 361 300     | 111 650  | 0.98           | 0.2                        | 0.76                | 1 to 106                      |
|                                 |                |                     | ≤54 vs ≥55           | 3296     | 191      | 288 850     | 184 100  | 0.95           | 0.5                        | 0.61                | 1 to 88                       |
|                                 |                |                     | ≤59 vs ≥60           | 3003     | 484      | 202 869     | 270 081  | 0.86           | 1.4                        | 0.43                | 1 to 68                       |
|                                 |                |                     | ≤63 vs ≥64           | 2350     | 1137     | 109 233     | 363 717  | 0.67           | 3.3                        | 0.23                | 1 to 46                       |
|                                 |                |                     | ≤64 vs ≥65           | 2039     | 1448     | 88 283      | 384 667  | 0.58           | 4.2                        | 0.19                | 1 to 43                       |
|                                 |                |                     | ≤65 vs ≥66           | 1720     | 1767     | 67 644      | 405 306  | 0.49           | 5.1                        | 0.14                | 1 to 39                       |
|                                 |                |                     | ≤66 vs ≥67           | 1352     | 2135     | 48 951      | 423 999  | 0.39           | 6.1                        | 0.10                | 1 to 36                       |
|                                 |                |                     | ≤67 vs ≥68           | 974      | 2513     | 32 061      | 440 889  | 0.28           | 7.2                        | 0.07                | 1 to 33                       |
| ≤68 vs ≥69                      | 557            | 2930                | 16 730               | 456 220  | 0.16     | 8.4         | 0.04     | 1 to 30        |                            |                     |                               |
| ≤69 vs ≥70                      | 85             | 3402                | 2 201                | 470 749  | 0.02     | 9.8         | 0.005    | 1 to 26        |                            |                     |                               |

Abbreviations: ANU-ADRI, the Australian National University Alzheimer's Disease Risk Index; BDSI, the Brief Dementia Screening Indicator; CAIDE, the Cardiovascular Risk Factors, Aging, and Incidence of Dementia Score; CI, confidence interval.  
\*Cut offs recommended in literature.

**eTable 7. Performance of Dementia Risk Scores and Age Only to Estimate 10-Year Dementia Risk at Age 65 (±1) Years**

| Risk score                      | Observed range | C-index (95% CI)    | Alternative cut offs | Dementia |          | No dementia |          | Detection rate | Number missed per 10 cases | False positive rate | Ratio true-to-false positives |
|---------------------------------|----------------|---------------------|----------------------|----------|----------|-------------|----------|----------------|----------------------------|---------------------|-------------------------------|
|                                 |                |                     |                      | Test pos | Test neg | Test pos    | Test neg |                |                            |                     |                               |
| CAIDE Score (Clinical version)  | 4 to 14        | 0.52 (0.50 to 0.54) | 0-5 vs ≥6            | 745      | 114      | 45 307      | 7 966    | 0.87           | 1.3                        | 0.85                | 1 to 61                       |
|                                 |                |                     | 0-6 vs ≥7            | 644      | 215      | 37 852      | 15 421   | 0.75           | 2.5                        | 0.71                | 1 to 59                       |
|                                 |                |                     | 0-7 vs ≥8            | 466      | 393      | 26 625      | 26 648   | 0.54           | 4.6                        | 0.50                | 1 to 57                       |
|                                 |                |                     | 0-8 vs ≥9*           | 289      | 570      | 17 443      | 35 830   | 0.34           | 6.6                        | 0.33                | 1 to 60                       |
|                                 |                |                     | 0-9 vs ≥10*          | 160      | 699      | 9 256       | 44 017   | 0.19           | 8.1                        | 0.17                | 1 to 58                       |
|                                 |                |                     | 0-10 vs ≥11          | 70       | 789      | 4 323       | 48 950   | 0.08           | 9.2                        | 0.08                | 1 to 62                       |
|                                 |                |                     | 0-11 vs ≥12          | 35       | 824      | 1 623       | 51 650   | 0.04           | 9.6                        | 0.03                | 1 to 46                       |
| CAIDE Score (APOE supplemented) | 5 to 17        | 0.60 (0.58 to 0.62) | 0-5 vs ≥6            | 706      | 7        | 42 650      | 1 521    | 0.99           | 0.1                        | 0.97                | 1 to 60                       |
|                                 |                |                     | 0-6 vs ≥7            | 670      | 43       | 38 536      | 5 635    | 0.94           | 0.6                        | 0.87                | 1 to 58                       |
|                                 |                |                     | 0-7 vs ≥8            | 628      | 85       | 33 519      | 10 652   | 0.88           | 1.2                        | 0.76                | 1 to 53                       |
|                                 |                |                     | 0-8 vs ≥9            | 530      | 183      | 25 718      | 18 453   | 0.74           | 2.6                        | 0.58                | 1 to 49                       |
|                                 |                |                     | 0-9 vs ≥10*          | 401      | 312      | 18 464      | 25 707   | 0.56           | 4.4                        | 0.42                | 1 to 46                       |
|                                 |                |                     | 0-10 vs ≥11*         | 281      | 432      | 12 757      | 31 414   | 0.39           | 6.1                        | 0.29                | 1 to 45                       |
|                                 |                |                     | 0-11 vs ≥12          | 166      | 547      | 7 023       | 37 148   | 0.23           | 7.7                        | 0.16                | 1 to 42                       |
| BDSI                            | 0 to 34        | 0.59 (0.57 to 0.60) | 0-12 vs ≥13          | 109      | 604      | 4 029       | 40 142   | 0.15           | 8.5                        | 0.09                | 1 to 37                       |
|                                 |                |                     | 0-13 vs ≥14          | 54       | 659      | 1 946       | 42 225   | 0.08           | 9.2                        | 0.04                | 1 to 36                       |
|                                 |                |                     | 0-4 vs ≥5            | 531      | 336      | 26 265      | 26 425   | 0.61           | 3.9                        | 0.50                | 1 to 49                       |
|                                 |                |                     | 0-6 vs ≥7            | 479      | 388      | 24 494      | 28 196   | 0.55           | 4.5                        | 0.46                | 1 to 49                       |
|                                 |                |                     | 0-8 vs ≥9            | 450      | 417      | 23 715      | 28 975   | 0.52           | 4.8                        | 0.45                | 1 to 53                       |
|                                 |                |                     | 0-9 vs ≥10           | 284      | 583      | 11 371      | 41 319   | 0.33           | 6.7                        | 0.22                | 1 to 40                       |
|                                 |                |                     | 0-14 vs ≥15          | 134      | 733      | 3 879       | 48 811   | 0.15           | 8.5                        | 0.07                | 1 to 29                       |
| ANU-ADRI                        | -18 to 22      | 0.57 (0.55 to 0.60) | 0-15 vs ≥16          | 81       | 786      | 1 832       | 50 858   | 0.09           | 9.1                        | 0.03                | 1 to 23                       |
|                                 |                |                     | 0-21 vs ≥22*         | 14       | 853      | 198         | 52 492   | 0.02           | 9.8                        | 0.004               | 1 to 14                       |
|                                 |                |                     | ≤-11 vs ≥-10         | 579      | 76       | 34 118      | 6 922    | 0.88           | 1.2                        | 0.83                | 1 to 59                       |
|                                 |                |                     | ≤-6 vs ≥-5           | 417      | 238      | 22 269      | 18 771   | 0.64           | 3.6                        | 0.54                | 1 to 53                       |
|                                 |                |                     | ≤-4 vs ≥-3           | 337      | 318      | 17 175      | 23 865   | 0.51           | 4.9                        | 0.42                | 1 to 51                       |
|                                 |                |                     | ≤-3 vs ≥-2           | 298      | 357      | 14 748      | 26 292   | 0.45           | 5.5                        | 0.36                | 1 to 49                       |
|                                 |                |                     | ≤0 vs ≥1             | 195      | 460      | 8 333       | 32 707   | 0.30           | 7.0                        | 0.20                | 1 to 43                       |
| ≤4 vs ≥5                        | 97             | 558                 | 3 064                | 37 976   | 0.15     | 8.5         | 0.07     | 1 to 32        |                            |                     |                               |
| ≤5 vs ≥6                        | 74             | 581                 | 2 321                | 38 719   | 0.11     | 8.9         | 0.06     | 1 to 31        |                            |                     |                               |
| ≤6 vs ≥7                        | 52             | 603                 | 1 664                | 39 376   | 0.08     | 9.2         | 0.04     | 1 to 32        |                            |                     |                               |
| ≤9 vs ≥10                       | 25             | 630                 | 538                  | 40 502   | 0.038    | 9.6         | 0.01     | 1 to 22        |                            |                     |                               |

Abbreviations: ANU-ADRI, the Australian National University Alzheimer's Disease Risk Index; BDSI, the Brief Dementia Screening Indicator; CAIDE Score, the Cardiovascular Risk Factors, Aging, and Incidence of Dementia Score; CI, confidence interval.  
\*Cut offs recommended in literature.

**eTable 8. Capacity of Dementia Risk Scores and Age Only to Estimate 20-Year Dementia Risk in the Whitehall II Study**

| Risk score                      | Observed range | C-index (95% CI)    | Alternative cut offs | Dementia |          | No dementia |          | Detection rate | Number missed per 10 cases | False positive rate | Ratio true-to-false positives |
|---------------------------------|----------------|---------------------|----------------------|----------|----------|-------------|----------|----------------|----------------------------|---------------------|-------------------------------|
|                                 |                |                     |                      | Test pos | Test neg | Test pos    | Test neg |                |                            |                     |                               |
| <b>20-YEAR DEMENTIA RISK</b>    |                |                     |                      |          |          |             |          |                |                            |                     |                               |
| CAIDE Score (Clinical version)  | 0 to 13        | 0.65 (0.61 to 0.68) |                      |          |          |             |          |                |                            |                     |                               |
|                                 |                |                     | 0-5 vs 6+            | 165      | 37       | 2,706       | 1,957    | 0.82           | 1.8                        | 0.58                | 1 to 16                       |
|                                 |                |                     | 0-6 vs 7+            | 111      | 91       | 1,771       | 2,892    | 0.55           | 4.5                        | 0.38                | 1 to 16                       |
|                                 |                |                     | 0-7 vs 8+            | 75       | 127      | 1,001       | 3,662    | 0.37           | 6.3                        | 0.21                | 1 to 13                       |
|                                 |                |                     | 0-8 vs 9+*           | 39       | 163      | 488         | 4,175    | 0.19           | 8.1                        | 0.10                | 1 to 13                       |
|                                 |                |                     | 0-9 vs 10+*          | 19       | 183      | 224         | 4,439    | 0.09           | 9.1                        | 0.05                | 1 to 12                       |
|                                 |                |                     | 0-10 vs 11+          | 11       | 191      | 84          | 4,579    | 0.05           | 9.5                        | 0.02                | 1 to 8                        |
| CAIDE Score (APOE supplemented) | 0 to 15        | 0.74 (0.70 to 0.78) |                      |          |          |             |          |                |                            |                     |                               |
|                                 |                |                     | 0-5 vs 6+            | 136      | 9        | 2,608       | 1,032    | 0.94           | 0.6                        | 0.72                | 1 to 19                       |
|                                 |                |                     | 0-6 vs 7+            | 126      | 19       | 2,035       | 1,605    | 0.87           | 1.3                        | 0.56                | 1 to 16                       |
|                                 |                |                     | 0-7 vs 8+            | 105      | 40       | 1,286       | 2,354    | 0.72           | 2.8                        | 0.35                | 1 to 12                       |
|                                 |                |                     | 0-8 vs 9+            | 87       | 58       | 837         | 2,803    | 0.60           | 4.0                        | 0.23                | 1 to 10                       |
|                                 |                |                     | 0-9 vs 10+*          | 52       | 93       | 446         | 3,194    | 0.36           | 6.4                        | 0.12                | 1 to 9                        |
|                                 |                |                     | 0-10 vs 11+*         | 34       | 111      | 233         | 3,407    | 0.23           | 7.7                        | 0.06                | 1 to 7                        |
|                                 |                |                     | 0-11 vs 12+          | 15       | 130      | 111         | 3,529    | 0.10           | 9.0                        | 0.03                | 1 to 7                        |
|                                 |                |                     | 0-12 vs 13+          | 7        | 138      | 39          | 3,601    | 0.05           | 9.5                        | 0.01                | 1 to 6                        |
| Age only                        | 45 to 69       | 0.79 (0.77 to 0.82) |                      |          |          |             |          |                |                            |                     |                               |
|                                 |                |                     | ≤49 vs 50+           | 200      | 2        | 3,664       | 999      | 0.99           | 0.1                        | 0.79                | 1 to 18                       |
|                                 |                |                     | ≤54 vs 55+           | 183      | 19       | 2,223       | 2,440    | 0.91           | 0.9                        | 0.48                | 1 to 12                       |
|                                 |                |                     | ≤59 vs 60+           | 145      | 57       | 1,250       | 3,413    | 0.72           | 2.8                        | 0.27                | 1 to 9                        |
|                                 |                |                     | ≤63 vs 64+           | 79       | 123      | 513         | 4,150    | 0.39           | 6.1                        | 0.11                | 1 to 6                        |
|                                 |                |                     | ≤64 vs 65+           | 40       | 162      | 336         | 4,327    | 0.20           | 8.0                        | 0.07                | 1 to 8                        |
|                                 |                |                     | ≤65 vs 66+           | 18       | 184      | 158         | 4,505    | 0.09           | 9.1                        | 0.03                | 1 to 9                        |
|                                 |                |                     | ≤66 vs 67+           | 9        | 193      | 34          | 4,629    | 0.04           | 9.6                        | 0.01                | 1 to 4                        |

Abbreviations: ANU-ADRI, the Australian National University Alzheimer's Disease Risk Index; BDI, the Brief Dementia Screening Indicator; CAIDE, the Cardiovascular Risk Factors, Aging, and Incidence of Dementia Score; CI, confidence interval; NA, not available, because there were no true positives in the sample.  
\*Cut offs recommended in literature.

## Statistical code

version 17

\*\*\*\* UK BIOBANK \*\*\*\*

```
capture log close
log using "Analysis.log", append
```

```
use "UKB_dementia_risk_scores_12122022.dta", clear
merge 1:1 n_eid using "ethnic background.dta"
drop if _merge==2
drop _merge
```

```
tab ethnic
gen non_white = !inlist(ethnic,1,99)
tab non_white ethnic, mis
```

```
*Put dementia to missing if dementia diagnosis was recorded after the end of the follow-up
count if dementia_date > date_exit & dementia_date<.
replace dementia_date = . if dementia_date > date_exit & dementia_date<.
replace dementia = 0 if dementia_date==.
replace dementia_code = "" if dementia_date==.
```

\*Flowchart

```
*Attended baseline assessment
*503317 (from Fry A et al. Am J Epidemiol. 2017 Nov 1;186(9):1026-1034. PMID: 28641372)
*Available in our data
count
*502388
di 503317-502388
*929
di 929/503310
*0.2%
count if date_recruit!=.
*502,388
```

\*Missing data for each risk score:

```
*CAIDE1:
gen full_data_caide_1 = 1
foreach var in date_recruit age_caide_1 education_caide_1 sex_caide_1 sbp_caide_1 bmi_caide_1 tot_chol_caide_1
phyact_caide_1 {
    replace full_data_caide_1 = 0 if `var'==.
}
tab full_data_caide_1
```

```
*CAIDE2:
gen full_data_caide_2 = 1
foreach var in date_recruit age_caide_2 education_caide_2 sex_caide_2 sbp_caide_2 bmi_caide_2 tot_chol_caide_2
phyact_caide_2 apoe_caide_2 {
    replace full_data_caide_2 = 0 if `var'==.
}
tab full_data_caide_2
```

```
*BRIEF:
gen full_data_brief = 1
```

```

foreach var in date_recruit age_brief education_brief bmi_brief diabetes_brief stroke_brief help_brief depression_brief
{
    replace full_data_brief = 0 if `var'==.
}
tab full_data_brief

*anu_adri:
gen full_data_anu_adri = 1
foreach var in date_recruit age_anu_adri education_anu_adri bmi_anu_adri diabetes_anu_adri depression_anu_adri
tot_chol_anu_adri tbi_anu_adri smoker_anu_adri alcohol_anu_adri social_anu_adri phyact_anu_adri
cogn_act_anu_adri fish_per_week_anu_adri pesticides_ever_anu_adri {
    replace full_data_anu_adri = 0 if `var'==.
}
tab full_data_anu_adri

*Full data for at least one risk score:
egen full_data_any_score = rowmax(full_data_caide_1 full_data_caide_2 full_data_brief full_data_anu_adri)
tab full_data_any_score
*476525

di 502388-476525
*25863
di (502388-476525)/(503317)
*5.2%

*Total exclusions at this point
di 929 + 25863
*26792
di 26792/503317
*5.3%

*Aged <40 or >70
gen out_of_age = age_recruit<40 | age_recruit>70
tab out_of_age
*17
di 17/503317
*0.0%
*Do not drop these at this moment

*Dementia at baseline
gen dementia_baseline = dementia_date<=date_recruit & date_recruit!=.
tab dementia_baseline
tab dementia_baseline if full_data_any_score==1
*88 (0.02%)

*Follow up less than 365 days
gen short_fu = (date_exit - date_recruit)<365
tab short_fu
tab short_fu if dementia_baseline==0 & full_data_any_score==1
*978 (0.2%)

*Cause of short follow-up
gen short_dem = dementia_baseline==0 & full_data_any_score==1 & short_fu==1 & dementia==1
tab short_dem if dementia_baseline==0 & full_data_any_score==1
gen short_death = dementia_baseline==0 & full_data_any_score==1 & short_fu==1 & dementia==0 & (date_death -
date_recruit)<365
tab short_death if dementia_baseline==0 & full_data_any_score==1
gen short_lost = dementia_baseline==0 & full_data_any_score==1 & short_fu==1 & dementia==0 & (date_lost -
date_recruit)<365
tab short_lost if dementia_baseline==0 & full_data_any_score==1

```

```

*dementia at baseline 40
*died too soon 869
*lost to follow-up too soon 69
di 40+869+69

*Theoretical follow-up less than 10-years
capture drop theor_fu
gen theor_fu = (date_end_of_fu - date_recruit)/365.25
capture drop theor_fu_10
egen theor_fu_10 = cut(theor_fu), at(0,10,100)
tab theor_fu_10
tab theor_fu_10 if dementia_baseline==0 & short_fu==0 & full_data_any_score==1
*9530 (2.0%)

di 88 + 978 + 9530
*10596

di 10596/476525
*2.2%

*10596 (2.2%) excluded

*GENERATE VARIABLES FOR ANALYTIC SAMPLES
gen sample = full_data_any_score==1 & theor_fu_10==10 & short_fu==0 & dementia_baseline==0
tab sample
*465929 in sample

foreach score in caide_1 caide_2 brief anu_adri {
capture drop sample_`score'
gen sample_`score' = full_data_`score'==1 & dementia_baseline==0 & short_fu==0 & theor_fu>=10
tab sample_`score'
}
gen sample_age_recruit = sample

*SAMPLE FOR SENSITIVITY ANALYSIS THAT DOES NOT EXCLUDE SHORT FOLLOW UP
gen sample_sens = full_data_any_score==1 & dementia_baseline==0
tab sample_sens
*476437 in sample

foreach score in caide_1 caide_2 brief anu_adri {
capture drop sample_sens_`score'
gen sample_sens_`score' = full_data_`score'==1 & dementia_baseline==0
tab sample_sens_`score'
}
gen sample_sens_age_recruit = sample_sens

*GENERATE DEMENTIA RISK SCORES
gen caide_1 = age_caide_1 + education_caide_1 + sex_caide_1 + sbp_caide_1 + bmi_caide_1 + tot_chol_caide_1 +
phyact_caide_1
tab sample_caide_1
sum caide_1 if sample_caide_1==1

gen caide_2 = age_caide_2 + education_caide_2 + sex_caide_2 + sbp_caide_2 + bmi_caide_2 + tot_chol_caide_2 +
phyact_caide_2 + apoe_caide_2
tab sample_caide_2
sum caide_2 if sample_caide_2==1

gen brief = age_brief + education_brief + bmi_brief + diabetes_brief + stroke_brief + help_brief + depression_brief
tab sample_brief

```

sum brief if sample\_brief==1

gen anu\_adri = age\_anu\_adri + education\_anu\_adri + bmi\_anu\_adri + diabetes\_anu\_adri + depression\_anu\_adri +  
 tot\_chol\_anu\_adri + tbi\_anu\_adri + smoker\_anu\_adri + alcohol\_anu\_adri + social\_anu\_adri + phyact\_anu\_adri +  
 cogn\_act\_anu\_adri + fish\_per\_week\_anu\_adri + pesticides\_ever\_anu\_adri  
 tab sample\_anu\_adri  
 sum anu\_adri if sample\_anu\_adri==1

\*CHECK ITEMS OF DEMENTIA RISK SCORES

\*CAIDE 1:

tab age\_caide\_1  
 bysort age\_caide\_1: sum age\_recruit

tab education\_caide\_1  
 bysort education\_caide\_1: sum education\_years

tab sex\_caide\_1  
 bysort sex\_caide\_1: sum sex

tab sbp\_caide\_1  
 bysort sbp\_caide\_1: sum sbp

tab bmi\_caide\_1  
 bysort bmi\_caide\_1: sum bmi

tab tot\_chol\_caide\_1  
 bysort tot\_chol\_caide\_1: sum tot\_chol

tab phyact\_caide\_1  
 bysort phyact\_caide\_1: sum inactive  
 tab phyact\_caide\_1 vig  
 \*All correct

\*CAIDE 2:

tab age\_caide\_2  
 bysort age\_caide\_2: sum age\_recruit

tab education\_caide\_2  
 bysort education\_caide\_2: sum education\_years

tab sex\_caide\_2  
 bysort sex\_caide\_2: sum sex

tab sbp\_caide\_2  
 bysort sbp\_caide\_2: sum sbp

tab bmi\_caide\_2  
 bysort bmi\_caide\_2: sum bmi

tab tot\_chol\_caide\_2  
 bysort tot\_chol\_caide\_2: sum tot\_chol

tab phyact\_caide\_2  
 bysort phyact\_caide\_2: sum inactive  
 tab phyact\_caide\_2 vig

tab apoe\_caide\_2  
 tab apoe\_caide\_2 apoe  
 \*All correct

**\*BRIEF**

tab age\_brief

bysort age\_brief: sum age\_recruit

tab education\_brief

bysort education\_brief: sum education\_years

tab bmi\_brief

bysort bmi\_brief: sum bmi

tab diabetes\_brief

tab diabetes\_brief diabetes

tab stroke\_brief

tab stroke\_brief stroke

tab help\_brief

tab depression\_brief

\*All correct

**\*ANU-ADRI**

tab age\_anu\_adri if sex==1

tab age\_anu\_adri if sex==0

bysort sex age\_anu\_adri: sum age\_recruit

tab education\_anu\_adri

bysort education\_anu\_adri: sum education\_years

tab bmi\_anu\_adri

tab bmi\_anu\_adri if age\_recruit >=60

bysort bmi\_anu\_adri: sum bmi

bysort bmi\_anu\_adri: sum bmi if age\_recruit <60

bysort bmi\_anu\_adri: sum bmi if age\_recruit >=60

tab diabetes\_anu\_adri

tab diabetes\_anu\_adri diabetes

tab depression\_anu\_adri

tab tot\_chol\_anu\_adri

tab tot\_chol\_anu\_adri if age\_recruit >=60

bysort tot\_chol\_anu\_adri: sum tot\_chol if age\_recruit <60

bysort tot\_chol\_anu\_adri: sum tot\_chol if age\_recruit >=60

tab tbi\_anu\_adri

tab tbi\_anu\_adri tbi

tab smoker\_anu\_adri

tab smoker\_anu\_adri smoker

tab alcohol\_anu\_adri

tab alcohol\_anu\_adri abstainer

tab social\_anu\_adri

tab social\_anu\_adri social\_saczynski\_cut

tab phyact\_anu\_adri

tab phyact\_anu\_adri ipaq

```
tab cogn_act_anu_adri
tab cogn_act_anu_adri cogn_act
```

```
tab fish_per_week_anu_adri
tab fish_per_week_anu_adri fish_per_week
```

```
tab pesticides_ever_anu_adri
tab pesticides_ever_anu_adri pesticides_ever
*All correct
```

```
**** 10-year dementia risk among all****
```

```
capture drop date_exit_10
capture drop dementia_10
gen date_exit_10 = date_recruit + round(10*365.25)
sset date_exit, failure(dementia) id(n_eid) origin(date_recruit) scale(365.25) exit(date_exit_10)
gen dementia_10 = _d==1 if date_recruit!=.
```

```
tab dementia_10
*Put to missing those who had dementia at baseline, less than 365 days of follow up or less than ten years of theoretical follow up:
```

```
replace dementia_10 = . if dementia_baseline==1
replace dementia_10 = . if short_fu==1
replace dementia_10 = . if theor_fu_10==0
```

```
*Indicators for the availability of the scores
```

```
capture gen caide_1_available = 1 if caide_1!=.
capture gen caide_2_available = 1 if caide_2!=.
capture gen brief_available = 1 if brief!=.
capture gen anu_adri_available = 1 if anu_adri!=.
```

```
*Missing table with column percentage
```

```
baselinetable ///
    age_recruit(cts novarlabel afterhead("Age at entry, years")) ///
    sex(novarlabel afterhead("Sex")) ///
    non_white(novarlabel afterhead("Non-white ethnicity")) ///
    caide_1_available (novarlabel afterhead("CAIDE score (clinical version) available")) ///
    caide_1(cts novarlabel afterhead("CAIDE score (clinical version)")) ///
    age_caide_1(novarlabel afterhead("Age, CAIDE (clinical version)")) ///
    sex_caide_1 (novarlabel afterhead("Sex, CAIDE (clinical version)")) ///
    education_caide_1 (novarlabel afterhead("Education, CAIDE (clinical version)")) ///
    sbp_caide_1 (novarlabel afterhead("Systolic blood pressure, CAIDE (clinical version)")) ///
    bmi_caide_1 (novarlabel afterhead("Body mass index, CAIDE (clinical version)")) ///
    tot_chol_caide_1 (novarlabel afterhead("Total cholesterol, CAIDE (clinical version)")) ///
    phyact_caide_1 (novarlabel afterhead("Physical activity, CAIDE (clinical version)")) ///
    caide_2_available (novarlabel afterhead("CAIDE score (APOE supplemented) available")) ///
    caide_2(cts novarlabel afterhead("CAIDE score (APOE supplemented)")) ///
    age_caide_2(novarlabel afterhead("Age, CAIDE (APOE supplemented)")) ///
    sex_caide_2 (novarlabel afterhead("Sex, CAIDE (APOE supplemented)")) ///
    education_caide_2 (novarlabel afterhead("Education, CAIDE (APOE supplemented)")) ///
    sbp_caide_2 (novarlabel afterhead("Systolic blood pressure, CAIDE (APOE supplemented)")) ///
    bmi_caide_2 (novarlabel afterhead("Body mass index, CAIDE (APOE supplemented)")) ///
    tot_chol_caide_2 (novarlabel afterhead("Total cholesterol, CAIDE (APOE supplemented)")) ///
    phyact_caide_2 (novarlabel afterhead("Physical activity, CAIDE (APOE supplemented)")) ///
    apoe_caide_2 (novarlabel afterhead("APOE4 carrier, CAIDE (APOE supplemented)")) ///
    brief_available (novarlabel afterhead("Brief score available")) ///
    brief(cts novarlabel afterhead("Brief score")) ///
    age_brief (novarlabel afterhead("Age, Brief")) ///
    education_brief (novarlabel afterhead("Education, Brief")) ///
    bmi_brief (novarlabel afterhead("Body mass index, Brief")) ///
    diabetes_brief (novarlabel afterhead("Diabetes, Brief")) ///
```

```

stroke_brief (novarlabel afterhead("History of stroke, Brief")) ///
help_brief (novarlabel afterhead("Needs help, Brief")) ///
depression_brief (novarlabel afterhead("Depressive symptoms, Brief")) ///
anu_adri_available (novarlabel afterhead("ANU-ADRI score available")) ///
anu_adri(cts novarlabel afterhead("ANU-ADRI score")) ///
age_anu_adri (novarlabel afterhead("Age, ANU-ADRI")) ///
education_anu_adri (novarlabel afterhead("Education, ANU-ADRI")) ///
bmi_anu_adri (novarlabel afterhead("Body mass index, ANU-ADRI")) ///
diabetes_anu_adri (novarlabel afterhead("Diabetes, ANU-ADRI")) ///
depression_anu_adri (novarlabel afterhead("Depressive symptoms, ANU-ADRI")) ///
tot_chol_anu_adri (novarlabel afterhead("Total cholesterol, ANU-ADRI")) ///
tbi_anu_adri (novarlabel afterhead("History of traumatic brain injury, ANU-ADRI")) ///
smoker_anu_adri (novarlabel afterhead("Smoking status, ANU-ADRI")) ///
alcohol_anu_adri (novarlabel afterhead("Alcohol drinking, ANU-ADRI")) ///
social_anu_adri (novarlabel afterhead("Social engagement, ANU-ADRI")) ///
phyact_anu_adri (novarlabel afterhead("Physical activity, ANU-ADRI")) ///
cogn_act_anu_adri (novarlabel afterhead("Cognitive activity, ANU-ADRI")) ///
fish_per_week_anu_adri (novarlabel afterhead("Fish intake, ANU-ADRI")) ///
pesticides_ever_anu_adri (novarlabel afterhead("Pesticide exposure, ANU-ADRI")) ///
, by(dementia_10, total) ctsvartab(mean (sd)) catvartab(# (%\%)) missing ///
exportexcel(Table_data_vs_missing_12122022, cell(A6) replace)

```

\*Simple missing table with column percentage

```
capture label define missing 0 "Available" 1 "Missing"
```

```
foreach var in age_recruit sex ethnic education_years sbp_caide_1 bmi_caide_1 tot_chol_caide_1 vig2 apoe_caide_2
diabetes stroke help depression_brief tbi smoker alcohol_anu_adri social_saczynski_cut ipaq_012 cogn_act
```

```
fish_per_week pesticides_ever {
```

```
di ""
```

```
di "`var'"
```

```
tab `var', mis
```

```
capture drop missing_`var'
```

```
gen missing_`var' = inlist(`var',.)
```

```
if "`var'" == "ethnic" {
```

```
    replace missing_`var' = 1 if `var'==99
```

```
}
```

```
label values missing_`var' missing
```

```
tab missing_`var'
```

```
}
```

```
baselinetable ///
```

```
missing_age_recruit(novarlabel afterhead("Age at entry, years")) ///
```

```
missing_sex(novarlabel afterhead("Sex")) ///
```

```
missing_ethnic(novarlabel afterhead("Ethnicity")) ///
```

```
missing_education_years (novarlabel afterhead("Education, years")) ///
```

```
missing_sbp_caide_1 (novarlabel afterhead("Systolic blood pressure")) ///
```

```
missing_bmi_caide_1 (novarlabel afterhead("Body mass index")) ///
```

```
missing_tot_chol_caide_1 (novarlabel afterhead("Total cholesterol")) ///
```

```
missing_vig2 (novarlabel afterhead("Physical activity, times per week")) ///
```

```
missing_ipaq_012 (novarlabel afterhead("Physical activity, IPAQ group")) ///
```

```
missing_apoe_caide_2 (novarlabel afterhead("APOE4 carrier")) ///
```

```
missing_diabetes (novarlabel afterhead("Diabetes mellitus")) ///
```

```
missing_stroke (novarlabel afterhead("History of stroke")) ///
```

```
missing_help (novarlabel afterhead("Needs help")) ///
```

```
missing_depression_brief (novarlabel afterhead("Depressive symptoms")) ///
```

```
missing_tbi (novarlabel afterhead("History of traumatic brain injury")) ///
```

```
missing_smoker (novarlabel afterhead("Smoking status")) ///
```

```
missing_alcohol (novarlabel afterhead("Alcohol drinking")) ///
```

```
missing_social (novarlabel afterhead("Social engagement")) ///
```

```
missing_cogn_act (novarlabel afterhead("Cognitive activity")) ///
```

```

missing_fish_per_week (novarlabel afterhead("Fish intake")) ///
missing_pesticides_ever (novarlabel afterhead("Occupational pesticide exposure")) ///
, catvartab(# (%\%)) missing ///
exportexcel(Table_missing_19122022, cell(A6) replace)

```

\*Missing table with row percentage

```

baselinetable ///
age_recruit(cts novarlabel afterhead("Age at entry, years")) ///
sex(novarlabel afterhead("Sex")) ///
non_white(novarlabel afterhead("Non-white ethnicity")) ///
caide_1_available (novarlabel afterhead("CAIDE score (clinical version) available")) ///
caide_1(cts novarlabel afterhead("CAIDE score (clinical version)")) ///
age_caide_1(novarlabel afterhead("Age, CAIDE (clinical version)")) ///
sex_caide_1 (novarlabel afterhead("Sex, CAIDE (clinical version)")) ///
education_caide_1 (novarlabel afterhead("Education, CAIDE (clinical version)")) ///
sbp_caide_1 (novarlabel afterhead("Systolic blood pressure, CAIDE (clinical version)")) ///
bmi_caide_1 (novarlabel afterhead("Body mass index, CAIDE (clinical version)")) ///
tot_chol_caide_1 (novarlabel afterhead("Total cholesterol, CAIDE (clinical version)")) ///
phyact_caide_1 (novarlabel afterhead("Physical activity, CAIDE (clinical version)")) ///
caide_2_available (novarlabel afterhead("CAIDE score (APOE supplemented) available")) ///
caide_2(cts novarlabel afterhead("CAIDE score (APOE supplemented)")) ///
age_caide_2(novarlabel afterhead("Age, CAIDE (APOE supplemented)")) ///
sex_caide_2 (novarlabel afterhead("Sex, CAIDE (APOE supplemented)")) ///
education_caide_2 (novarlabel afterhead("Education, CAIDE (APOE supplemented)")) ///
sbp_caide_2 (novarlabel afterhead("Systolic blood pressure, CAIDE (APOE supplemented)")) ///
bmi_caide_2 (novarlabel afterhead("Body mass index, CAIDE (APOE supplemented)")) ///
tot_chol_caide_2 (novarlabel afterhead("Total cholesterol, CAIDE (APOE supplemented)")) ///
phyact_caide_2 (novarlabel afterhead("Physical activity, CAIDE (APOE supplemented)")) ///
apoe_caide_2 (novarlabel afterhead("APOE4 carrier, CAIDE (APOE supplemented)")) ///
brief_available (novarlabel afterhead("Brief score available")) ///
brief(cts novarlabel afterhead("Brief score")) ///
age_brief (novarlabel afterhead("Age, Brief")) ///
education_brief (novarlabel afterhead("Education, Brief")) ///
bmi_brief (novarlabel afterhead("Body mass index, Brief")) ///
diabetes_brief (novarlabel afterhead("Diabetes, Brief")) ///
stroke_brief (novarlabel afterhead("History of stroke, Brief")) ///
help_brief (novarlabel afterhead("Needs help, Brief")) ///
depression_brief (novarlabel afterhead("Depressive symptoms, Brief")) ///
anu_adri_available (novarlabel afterhead("ANU-ADRI score available")) ///
anu_adri(cts novarlabel afterhead("ANU-ADRI score")) ///
age_anu_adri (novarlabel afterhead("Age, ANU-ADRI")) ///
education_anu_adri (novarlabel afterhead("Education, ANU-ADRI")) ///
bmi_anu_adri (novarlabel afterhead("Body mass index, ANU-ADRI")) ///
diabetes_anu_adri (novarlabel afterhead("Diabetes, ANU-ADRI")) ///
depression_anu_adri (novarlabel afterhead("Depressive symptoms, ANU-ADRI")) ///
tot_chol_anu_adri (novarlabel afterhead("Total cholesterol, ANU-ADRI")) ///
tbi_anu_adri (novarlabel afterhead("History of traumatic brain injury, ANU-ADRI")) ///
smoker_anu_adri (novarlabel afterhead("Smoking status, ANU-ADRI")) ///
alcohol_anu_adri (novarlabel afterhead("Alcohol drinking, ANU-ADRI")) ///
social_anu_adri (novarlabel afterhead("Social engagement, ANU-ADRI")) ///
phyact_anu_adri (novarlabel afterhead("Physical activity, ANU-ADRI")) ///
cogn_act_anu_adri (novarlabel afterhead("Cognitive activity, ANU-ADRI")) ///
fish_per_week_anu_adri (novarlabel afterhead("Fish intake, ANU-ADRI")) ///
pesticides_ever_anu_adri (novarlabel afterhead("Pesticide exposure, ANU-ADRI")) ///
, by(dementia_10) ctsvartab(mean (sd)) catvartab(# (r%\%)) missing ///
exportexcel(Table_data_vs_missing_row_percent_12122022, cell(A6) replace)

```

\*Table 1 (by inclusion vs exclusion to the sample)

```

baselinetable ///
age_recruit(cts novarlabel afterhead("Age at entry, years")) ///
sex(novarlabel afterhead("Sex")) ///
non_white(novarlabel afterhead("Non-white ethnicity")) ///
dementia_10(novarlabel afterhead("Dementia within 10 years")) ///
caide_1(cts novarlabel afterhead("CAIDE score (clinical version)")) ///
caide_2(cts novarlabel afterhead("CAIDE score (APOE supplemented)")) ///
brief(cts novarlabel afterhead("Brief score")) ///
anu_adri(cts novarlabel afterhead("ANU-ADRI score")) ///
, by(sample, total) ctsvar( mean (sd) missing ///
exportexcel(Table_1_by_sample, cell(A6) replace)

```

```

*p-values
tab sample
ttest age_recruit, by(sample)
tab sample sex, row chi
tab sample non_white, row chi
tab sample dementia_10, row chi

```

\*\*\*\* 10-year dementia risk in sample\*\*\*\*

```

capture drop dementia_10
stset date_exit if sample==1, failure(dementia) id(n_eid) origin(date_recruit) scale(365.25) exit(date_exit_10)
gen dementia_10 = _d==1
tab dementia_10

```

\*\*\*\*\* TABLE 1 \*\*\*\*\*

```

tab ethnic, mis, if sample==1
tab ethnic non_white if sample==1

```

\*Table 1 (by status of dementia during follow up)

```

sum caide_1 caide_2 brief anu_adri if sample==1
bysort dementia_10: sum caide_1 caide_2 brief anu_adri if sample==1

```

```

baselinetable ///
age_recruit(cts novarlabel afterhead("Age at entry, years")) ///
sex(novarlabel afterhead("Sex")) ///
non_white(novarlabel afterhead("Non-white ethnicity")) ///
caide_1(cts novarlabel afterhead("CAIDE score (clinical version)")) ///
caide_2(cts novarlabel afterhead("CAIDE score (APOE supplemented)")) ///
brief(cts novarlabel afterhead("Brief score")) ///
anu_adri(cts novarlabel afterhead("ANU-ADRI score")) ///
if sample==1 ///
, by(dementia_10, total) ctsvar( mean (sd) missing ///
exportexcel(Table_1_12122022, cell(A6) replace)

```

\*P-values for Table 1

```

ttest age_recruit if sample==1, by(dementia_10)
tab sex dementia_10 if sample==1, chi
tab non_white dementia_10 if sample==1, chi
ttest caide_1 if sample==1, by(dementia_10)
ttest caide_2 if sample==1, by(dementia_10)
ttest brief if sample_brief==1, by(dementia_10)
ttest anu_adri if sample_anu_adri==1, by(dementia_10)

```

\*\*\*\*\* FIGURE 1 \*\*\*\*\*

\*AUC:s

```

foreach score in caide_1 caide_2 brief anu_adri age_recruit {
    somersd dementia_10 `score' if sample_`score'==1, transf(c)
}

```

}

```

logistic dementia_10 caide_1 if sample_caide_1==1
lroc, title("CAIDE Score (Clinical version)") ///
    ytitle("Detection rate") ///
    xtitle("False positive rate") ///
    text(0.85 0.05 "AUC: 0.66 (95% CI 0.65-0.67)", placement(east)) ///
    scheme(s1mono) ///
    xlab(0(0.25)1, nogrid) ylab(0(0.25)1, nogrid)
graph export "ROC, caide_1.pdf", as(pdf) replace
graph export "ROC, caide_1.emf", as(emf) replace

```

```

logistic dementia_10 caide_2 if sample_caide_2==1
lroc, title("CAIDE Score (APOE supplemented)") ///
    ytitle("Detection rate") ///
    xtitle("False positive rate") ///
    text(0.85 0.05 "AUC: 0.73 (95% CI 0.72-0.73)", placement(east)) ///
    scheme(s1mono) ///
    xlab(0(0.25)1, nogrid) ylab(0(0.25)1, nogrid)
graph export "ROC, caide_2.pdf", as(pdf) replace
graph export "ROC, caide_2.emf", as(emf) replace

```

```

logistic dementia_10 brief if sample_brief==1
lroc, title("BDSI") ///
    ytitle("Detection rate") ///
    xtitle("False positive rate") ///
    text(0.85 0.05 "AUC: 0.68 (95% CI 0.67-0.69)", placement(east)) ///
    scheme(s1mono) ///
    xlab(0(0.25)1, nogrid) ylab(0(0.25)1, nogrid)
graph export "ROC, brief.pdf", as(pdf) replace
graph export "ROC, brief.emf", as(emf) replace

```

```

logistic dementia_10 anu_adri if sample_anu_adri==1
lroc, title("ANU-ADRI") ///
    ytitle("Detection rate") ///
    xtitle("False positive rate") ///
    text(0.85 0.05 "AUC: 0.59 (95% CI 0.58-0.60)", placement(east)) ///
    scheme(s1mono) ///
    xlab(0(0.25)1, nogrid) ylab(0(0.25)1, nogrid)
graph export "ROC, anu_adri.pdf", as(pdf) replace
graph export "ROC, anu_adri.emf", as(emf) replace

```

```

logistic dementia_10 age_recruit if sample==1
lroc, title("Age (years)") ///
    ytitle("Detection rate") ///
    xtitle("False positive rate") ///
    text(0.92 0.02 "AUC: 0.79 (95% CI 0.79-0.80)", placement(east)) ///
    scheme(s1mono) ///
    xlab(0(0.25)1, nogrid) ylab(0(0.25)1, nogrid)
graph export "ROC, age.pdf", as(pdf) replace
graph export "ROC, age.emf", as(emf) replace

```

\*\*\*Graphing scores by dementia status

\*Code adapted from Nick Cox: <https://www.statalist.org/forums/forum/general-stata-discussion/general/1547538-plot-kernel-density-estimates-as-areas>

\*visited 5.7.2022

sort n\_eid

```

*CAIDE1
tab caide_1
capture drop d0 d1
capture drop xvar
gen xvar = _n - 1 if _n<=16 // based on the theoretical range of 0-15
tab xvar
kdensity caide_1 if dementia_10==0 & sample_caide_1==1, bwidth(1) at(xvar) gen(d0)
kdensity caide_1 if dementia_10==1 & sample_caide_1==1, bwidth(1) at(xvar) gen(d1)
twoway area d1 d0 xvar, color(blue%30 orange%30) ///
    legend(order(2 "No dementia" 1 "Dementia" ) pos(1) ring(0) col(1)) ///
    xtitle("CAIDE Score (Clinical version)") ///
    ytitle("Density") ///
    scheme(s1color)
graph export "Kernel_density, caide_1_upd.pdf", as(pdf) replace
graph export "Kernel_density, caide_1_upd.emf", as(emf) replace

sum caide_1 if sample_caide_1
*observed range 0-14
twoway area d1 d0 xvar if xvar>=0 & xvar<=14, color(blue%30 orange%30) ///
    legend(order(2 "No dementia" 1 "Dementia" ) pos(1) ring(0) col(1)) ///
    xtitle("CAIDE Score (Clinical version)") ///
    ytitle("Density") ///
    scheme(s1color)
graph export "Kernel_density, caide_1_upd_obs.pdf", as(pdf) replace
graph export "Kernel_density, caide_1_upd_obs.emf", as(emf) replace

*CAIDE2
tab caide_2
capture drop d0 d1
capture drop xvar
gen xvar = _n - 1 if _n<=19 // based on the theoretical range of 0-18
tab xvar
kdensity caide_2 if dementia_10==0 & sample_caide_2==1, bwidth(1) at(xvar) gen(d0)
kdensity caide_2 if dementia_10==1 & sample_caide_2==1, bwidth(1) at(xvar) gen(d1)
twoway area d1 d0 xvar, color(blue%30 orange%30) ///
    legend(order(2 "No dementia" 1 "Dementia" ) pos(1) ring(0) col(1)) ///
    xtitle("CAIDE Score (Clinical version)") ///
    ytitle("Density") ///
    scheme(s1color)
graph export "Kernel_density, caide_2_upd.pdf", as(pdf) replace
graph export "Kernel_density, caide_2_upd.emf", as(emf) replace

sum caide_2 if sample_caide_2
*observed range 0-17
twoway area d1 d0 xvar if xvar>=0 & xvar<=17, color(blue%30 orange%30) ///
    legend(order(2 "No dementia" 1 "Dementia" ) pos(1) ring(0) col(1)) ///
    xtitle("CAIDE Score (APOE supplemented)") ///
    ytitle("Density") ///
    scheme(s1color)
graph export "Kernel_density, caide_2_upd_obs.pdf", as(pdf) replace
graph export "Kernel_density, caide_2_upd_obs.emf", as(emf) replace

*BRIEF
tab brief
capture drop d0 d1
capture drop xvar
gen xvar = _n - 1 if _n<=57 // based on the theoretical range of 0-56
tab xvar
kdensity brief if dementia_10==0 & sample_brief==1, bwidth(1) at(xvar) gen(d0)
kdensity brief if dementia_10==1 & sample_brief==1, bwidth(1) at(xvar) gen(d1)

```

```

twoway area d1 d0 xvar, color(blue%30 orange%30) ///
    legend(order(2 "No dementia" 1 "Dementia" ) pos(1) ring(0) col(1)) ///
    xtitle("BDSI") ///
    ytitle("Density") ///
    scheme(s1color) ///
    xscale(range(0 56)) ///
    xlabel(0 (20) 40)
graph export "Kernel_density, brief_upd.pdf", as(pdf) replace
graph export "Kernel_density, brief_upd.emf", as(emf) replace

sum brief if sample_brief==1
*observed range 0-42
twoway area d1 d0 xvar if xvar>=0 & xvar<=42, color(blue%30 orange%30) ///
    legend(order(2 "No dementia" 1 "Dementia" ) pos(1) ring(0) col(1)) ///
    xtitle("BDSI") ///
    ytitle("Density") ///
    scheme(s1color) ///
    xscale(range(0 42)) ///
    xlabel(0 (20) 40)
graph export "Kernel_density, brief_upd_obs.pdf", as(pdf) replace
graph export "Kernel_density, brief_upd_obs.emf", as(emf) replace

*ANU-ADRI
tab anu_adri
capture drop d0 d1
capture drop xvar
gen xvar = _n - 19 if _n<=133 // based on the theoretical range of -18 to 114
tab xvar
kdensity anu_adri if dementia_10==0 & sample_caide_1==1, bwidth(1) at(xvar) gen(d0)
gsort -n_eid
kdensity anu_adri if dementia_10==1 & sample_caide_1==1, bwidth(1) at(xvar) gen(d1)

twoway area d1 d0 xvar, color(blue%30 orange%30) ///
    legend(order(2 "No dementia" 1 "Dementia" ) pos(1) ring(0) col(1)) ///
    xtitle("ANU-ADRI") ///
    ytitle("Density") ///
    scheme(s1color) ///
    xscale(range(-18 114)) ///
    xlabel(-20 (20) 100)
graph export "Kernel_density, anu_adri_upd.pdf", as(pdf) replace
graph export "Kernel_density, anu_adri_upd.emf", as(emf) replace

sum anu_adri if sample_anu_adri==1
*observed range -18 to 28
twoway area d1 d0 xvar if xvar>=-18 & xvar<=28, color(blue%30 orange%30) ///
    legend(order(2 "No dementia" 1 "Dementia" ) pos(1) ring(0) col(1)) ///
    xtitle("ANU-ADRI") ///
    ytitle("Density") ///
    scheme(s1color) ///
    xscale(range(-18 28)) ///
    xlabel(-20 (10) 30)
graph export "Kernel_density, anu_adri_upd_obs.pdf", as(pdf) replace
graph export "Kernel_density, anu_adri_upd_obs.emf", as(emf) replace

*AGE
tab age_recruit if sample==1
capture drop d0 d1

```

```
capture drop xvar
gen xvar = _n + 37 if _n<=36 // based on the observed range of 38 to 73
tab xvar
kdensity age_recruit if dementia_10==0 & sample==1, bwidth(1) at(xvar) gen(d0)
kdensity age_recruit if dementia_10==1 & sample==1, bwidth(1) at(xvar) gen(d1)
tab xvar
```

```
twoway area d1 d0 xvar if xvar>=38 & xvar<=73, color(blue%30 orange%30) ///
    legend(order(2 "No dementia" 1 "Dementia" ) pos(1) ring(0) col(1)) ///
    xtitle("Age (years)") ///
    ytitle("Density") ///
    scheme(s1color)
graph export "Kernel_density, age_recruit_upd.pdf", as(pdf) replace
graph export "Kernel_density, age_recruit_upd.emf", as(emf) replace
```

**\*\*FIGURE 2\*\***

```
*dementia subtype
tab dementia_code
gen dementia_code_3 = substr(dementia_code,1,3)
tab dementia_code_3
gen dementia_type = 1 if inlist(dementia_code_3,"F00","G30")
replace dementia_type = 2 if inlist(dementia_code_3,"F01")
replace dementia_type = 3 if inlist(dementia_code,"F020","G310")
replace dementia_type = 4 if inlist(dementia_code,"F023")
replace dementia_type = 5 if inlist(dementia_code,"F021","F022","F024","F028","G318")
replace dementia_type = 6 if inlist(dementia_code_3,"F03") | inlist(dementia_code,"F051","G311")
tab dementia_type
tab dementia
label define dem_type 1 "AD" 2 "VaD" 3 "FTD" 4 "PDD" 5 "Other specified" 6 "Unspecified"
label values dementia_type dem_type
tab dementia_type
```

\*\*\* Harrel's c for each dementia subtype

```
putexcel set "FIGURES_TABLES_output.xlsx", sheet("Table 2") modify
local row 5
foreach score in caide_1 caide_2 brief anu_adri age_recruit {
    forvalues i=0/4 {
        di ""
        di "`score'"
        if `i'==0 {
            tab dementia_10 if sample_`score'==1
            somersd dementia_10 `score' if sample_`score'==1, transf(c)
            matrix m = r(table)
            quietly: putexcel G`row'=m[1,1], nformat(#.00)
            quietly: putexcel H`row'=m[5,1], nformat(#.00)
            quietly: putexcel I`row'=m[6,1], nformat(#.00)
            local ++row
        }
        else {
            tab dementia_type if dementia_type==`i' & dementia_10==1 &
sample_`score'==1

            capture drop type_10
            gen type_10 = dementia_type==`i' & dementia_10==1
            tab type_10 if sample_`score'==1
            somersd type_10 `score' if sample_`score'==1, transf(c)
            matrix m = r(table)
            quietly: putexcel G`row'=m[1,1], nformat(#.00)
            quietly: putexcel H`row'=m[5,1], nformat(#.00)
```

```

quietly: putexcel Γrow'=m[6,1], nformat(#.00)
local ++row
    }
    }
    local ++row
}

*** TABLE 3 ***
capture log close
log using "UKB Table 3 for all and by age group 3.log", replace

*Different cut-offs

*Range
foreach group in all 64 65+ {
di "-----"
di "Age group: `group'"
di "-----"

    preserve
    if "`group'" == "64" {
        drop if age_recruit >= 65
    }
    if "`group'" == "65+" {
        drop if age_recruit < 65
    }

foreach score in caide_1 caide_2 brief anu_adri age_recruit {
    tab `score' if sample_`score'==1
}

    restore
}

*Analysis
foreach group in all 64 65+ {
di "-----"
di "Age group: `group'"
di "-----"

    preserve
    if "`group'" == "64" {
        drop if age_recruit >= 65
    }
    if "`group'" == "65+" {
        drop if age_recruit < 65
    }

putexcel set "FIGURES_TABLES_output.xlsx", sheet("Table 3_`group'") modify

foreach score in caide_1 caide_2 brief anu_adri age_recruit {
    if "`score'"=="caide_1" {
        local row 6
        local cut_offs "6 7 8 9 10 11 12"
        local min 0
    }
    if "`score'"=="caide_2" {
        local row 14
        local cut_offs "6 7 8 9 10 11 12 13 14"
        local min 0
    }
}

```

```

if "`score'"=="brief" {
    local row 24
    local cut_offs "5 7 9 10 15 16 22"
    local min 0
}
if "`score'"=="anu_adri" {
    local row 32
    local cut_offs "-10 -5 -3 -2 1 5 6 7 10"
    local min -18
}
if "`score'"=="age_recruit" {
    local row 42
    local cut_offs "50 55 60 64 65 66 67 68 69 70"
    local min 37
}

di ""
di "SCORE: `score'"
di ""
tab `score' if sample_`score'==1
sum age_recruit if sample_`score'==1
somersd dementia_10 `score' if sample_`score'==1, transf(c)
matrix c = r(table)
matrix list c

quietly: putexcel Q`row'=c[1,1], nformat(#.00)
quietly: putexcel R`row'=c[5,1], nformat(#.00)
quietly: putexcel S`row'=c[6,1], nformat(#.00)
local ++row

foreach i in `cut_offs' {
    di ""
    di "Cut `score' at <i' vs `i'"
    capture drop `score'_cut
    egen `score'_cut = cut(`score'), at(`min',`i',100)
    tab `score'_cut if sample_`score'==1
    tab dementia_10 `score'_cut if sample_`score'==1, matcell(m)
    matrix list m
        quietly: putexcel T`row'=m[2,2], nformat(number)
        quietly: putexcel U`row'=m[2,1], nformat(number)
        quietly: putexcel V`row'=m[1,2], nformat(number)
        quietly: putexcel W`row'=m[1,1], nformat(number)
    tab dementia_10 `score'_cut if sample_`score'==1, row
    local ++row
}
}
restore
}
capture log close

*** TABLE 3 sensitivity analysis including also those with short follow-up***
capture log close
log using "UKB Table 3 sensitivity analysis including also short follow up broad 3.log", replace

foreach group in sens {
    di "-----"
    di "Age group: `group'"
    di "-----"

    preserve

```

```

    if "`group'" == "sens" {
        *sensitivity analysis that does not exclude those with short follow up
        capture drop dementia_10
        stset date_exit if sample_sens==1, failure(dementia) id(n_eid) origin(date_recruit) scale(365.25)
    exit(date_exit_10)
        gen dementia_10 = _d==1
        tab dementia_10
    }

putexcel set "FIGURES_TABLES_output.xlsx", sheet("Table 3_`group'") modify
foreach score in caide_1 caide_2 brief anu_adri age_recruit {
    if "`score'"=="caide_1" {
        local row 6
        local cut_offs "6 7 8 9 10 11 12"
        local min 0
    }
    if "`score'"=="caide_2" {
        local row 14
        local cut_offs "6 7 8 9 10 11 12 13 14"
        local min 0
    }
    if "`score'"=="brief" {
        local row 24
        local cut_offs "5 7 9 10 15 16 22"
        local min 0
    }
    if "`score'"=="anu_adri" {
        local row 32
        local cut_offs "-10 -5 -3 -2 1 5 6 7 10"
        local min -18
    }
    if "`score'"=="age_recruit" {
        local row 42
        local cut_offs "50 55 60 64 65 66 67 68 69 70"
        local min 37
    }
}

di ""
di "SCORE: `score'"
di ""
tab `score' if sample_sens_`score'==1
sum age_recruit if sample_sens_`score'==1
somersd dementia_10 `score' if sample_sens_`score'==1, transf(c)
matrix c = r(table)
matrix list c

quietly: putexcel Q`row'=c[1,1], nformat(#.00)
quietly: putexcel R`row'=c[5,1], nformat(#.00)
quietly: putexcel S`row'=c[6,1], nformat(#.00)
local ++row

foreach i in `cut_offs' {
    di ""
    di "Cut `score' at <`i' vs `i'+"
    capture drop `score'_cut
    egen `score'_cut = cut(`score'), at(`min',`i',100)
    tab `score'_cut if sample_sens_`score'==1
    tab dementia_10 `score'_cut if sample_sens_`score'==1, matcell(m)
    matrix list m
    quietly: putexcel T`row'=m[2,2], nformat(number)
}

```

```

        quietly: putexcel U`row'=m[2,1], nformat(number)
        quietly: putexcel V`row'=m[1,2], nformat(number)
        quietly: putexcel W`row'=m[1,1], nformat(number)
    tab dementia_10 `score'_cut if sample_sens_`score'==1, row
    local ++row
}
}
restore
}
capture log close

```

\*\*\* TABLE 4 at age 65 +/- 1 \*\*\*

```

capture log close
log using "UKB Table 4 (age 65 +- 1) 3.log", replace

```

\*Different cut-offs

```

foreach group in all {
di "-----"
di "Age group: `group'"
di "-----"

        preserve
        keep if inlist(age_recruit,64,65,66)

putexcel set "FIGURES_TABLES_output.xlsx", sheet("Table 4") modify
foreach score in caide_1 caide_2 brief anu_adri age_recruit {
    if "`score'"=="caide_1" {
        local row 6
        local cut_offs "6 7 8 9 10 11 12"
        local min 0
    }
    if "`score'"=="caide_2" {
        local row 14
        local cut_offs "6 7 8 9 10 11 12 13 14"
        local min 0
    }
    if "`score'"=="brief" {
        local row 24
        local cut_offs "5 7 9 10 15 16 22"
        local min 0
    }
    if "`score'"=="anu_adri" {
        local row 32
        local cut_offs "-10 -5 -3 -2 1 5 6 7 10"
        local min -18
    }
}

di ""
di "SCORE: `score'"
di ""
tab `score' if sample_`score'==1
sum age_recruit if sample_`score'==1
somersd dementia_10 `score' if sample_`score'==1, transf(c)
matrix c = r(table)
matrix list c

quietly: putexcel Q`row'=c[1,1], nformat(#.00)

```

```

quietly: putexcel R`row'=c[5,1], nformat(#.00)
quietly: putexcel S`row'=c[6,1], nformat(#.00)
local ++row

foreach i in `cut_offs' {
  di ""
  di "Cut `score' at <i' vs `i'+
  capture drop `score'_cut
  egen `score'_cut = cut(`score'), at(^min`,i',100)
  tab `score'_cut if sample_`score'==1
  tab dementia_10 `score'_cut if sample_`score'==1, matcell(m)
  matrix list m
  quietly: putexcel T`row'=m[2,2], nformat(number)
  quietly: putexcel U`row'=m[2,1], nformat(number)
  quietly: putexcel V`row'=m[1,2], nformat(number)
  quietly: putexcel W`row'=m[1,1], nformat(number)
  tab dementia_10 `score'_cut if sample_`score'==1, row
  local ++row
}
}
restore
}
capture log close

*** ANALYSES FOR THE MANUSCRIPT ***
capture log close
log using "UKB additional analyses.log", replace

tab dementia_10 if sample==1
stdescribe if sample==1
strate if sample==1, per(10000)

*Create quintiles:
foreach score in caide_1 caide_2 brief anu_adri age_recruit {
  capture drop `score'_quint
  tab `score' if sample_`score'==1
  centile `score' if sample_`score'==1, centile(20(20)80)
  xtile `score'_quint = `score' if sample_`score'==1, nq(5)
  tab `score'_quint
  tab `score'_quint dementia_10
  bysort `score'_quint: sum `score'
}

*Cox models for quintiles
foreach score in caide_1 caide_2 brief anu_adri age_recruit {
  di ""
  di "Cox model: Quintiles of `score' and the 10-year risk of dementia"
  tab `score'_quint if sample_`score'==1
  tab `score'_quint_d if sample_`score'==1, row
  stcox i.`score'_quint if sample_`score'==1, strata(area_0_0) base
}

log close

**** WHITEHALL II STUDY ****

capture log close
log using "Analysis WHII 02012023 caide phase 5.log", replace

```

use "WHII\_dementia\_risk\_scores\_caide\_phase5.dta", clear

\*Put dementia to missing if dementia diagnosis was recorded after the end of the follow-up count if dementia\_date > date\_exit & dementia\_date < .

\*0 to missing

\*Flowchart

\*Attended baseline assessment

\*10 308 (e.g. Machado-Fragua 2022 Circulating serum metabolites as predictors of dementia OR Lindbohm 2019 5-year.... OR <https://www.ucl.ac.uk/epidemiology-health-care/research/epidemiology-and-public-health/research/whitehall-ii/data-collection>, visited 17112022)

\*Attendance, phase 5: 7,870 (<https://www.ucl.ac.uk/epidemiology-health-care/research/epidemiology-and-public-health/research/whitehall-ii/data-collection>, visited 17112022)

sum tdatcrn

\*7870, this is correct

capture drop phase5

gen phase5 = tdatcrn!=.

tab phase5

\*Attending clinical screening at phase5

capture drop phase5\_clinical

gen phase5\_clinical = age\_s5!=.

tab phase5\_clinical

\*6551, this is close to 6537, which was reported by Machado-Fragua et al. 2022 Circulating serum metabolites as predictors of dementia

di 10308-6551

\*3757 did not attend phase 5 clinical examination

\*Reasons for non-attendance

\*died before phase 5

gen death\_s5 = date\_death<=tdatcrn & date\_death!=.

tab death\_s5

tab death\_s5 phase5\_clinical

\*Non-attendance for other reason

tab phase5\_clinical death\_s5, row

di 2958/10308

\*28.7%

\*Missing data for each risk score:

\*CAIDE1:

capture drop full\_data\_caide\_1

gen full\_data\_caide\_1 = 1

foreach var in age\_caide\_1 education\_caide\_1 sex\_caide\_1 sbp\_caide\_1 bmi\_caide\_1 tot\_chol\_caide\_1

phyact\_caide\_1 tdatcrn date\_exit {

    replace full\_data\_caide\_1 = 0 if `var'==.

}

tab full\_data\_caide\_1

\*4872 yes

tab phase5\_clinical full\_data\_caide\_1

tab phase5\_clinical phase5 if full\_data\_caide\_1==0

\*5436 no (2438 did not attend phase 5 at all, 1319 did not attend phase 5 clinical assessment, 1679 had missing data)

di 6551-1679

di 1679/6551

\*25.6%

```

*CAIDE2:
gen full_data_caide_2 = 1
foreach var in age_caide_1 education_caide_1 sex_caide_1 sbp_caide_1 bmi_caide_1 tot_chol_caide_1
phyact_caide_1 apoe_caide_2 tdatscrn date_exit {
    replace full_data_caide_2 = 0 if `var'==.
}
tab full_data_caide_2
*3785 yes
tab phase5_clinical full_data_caide_2
tab phase5_clinical phase5 if full_data_caide_2==0
*6523 no (2438 did not attend phase 5 at all, 1319 did not attend phase 5 clinical assessment, 2766 had missing data)

*Dementia at baseline
capture drop dementia_baseline
gen dementia_baseline = dementia_date<=tdatscrn & tdatscrn<.
tab dementia_baseline
*0

*Follow up less than 365 days
gen short_fu = (date_exit - tdatscrn)<365
tab short_fu if full_data_caide_1
*7

*Theoretical follow-up less than 10 years (theoretical follow up is until 21824 [02oct2019])
capture drop theor_fu
gen theor_fu = (21824 - tdatscrn)/365.25
capture drop theor_fu_10
sum theor_fu
egen theor_fu_10 = cut(theor_fu), at(0,10,100)
tab theor_fu_10
*0

*Theoretical follow-up less than 20 years
capture drop theor_fu_20
sum theor_fu
egen theor_fu_20 = cut(theor_fu), at(0,20,100)
tab theor_fu_20
*0

*GENERATE VARIABLES FOR ANALYTIC SAMPLES
foreach score in caide_1 caide_2 {
capture drop sample_`score'
gen sample_`score' = full_data_`score'==1
replace sample_`score' = 0 if dementia_baseline==1
replace sample_`score' = 0 if short_fu==1
replace sample_`score' = 0 if theor_fu<10
tab sample_`score'
}
gen sample = sample_caide_1
gen sample_age_s5_full = sample_caide_1

*GENERATE DEMENTIA RISK SCORES
gen caide_1 = age_caide_1 + education_caide_1 + sex_caide_1 + sbp_caide_1 + bmi_caide_1 + tot_chol_caide_1 +
phyact_caide_1
tab sample_caide_1
sum caide_1 if sample_caide_1==1

gen caide_2 = age_caide_2 + education_caide_2 + sex_caide_2 + sbp_caide_2 + bmi_caide_2 + tot_chol_caide_2 +
phyact_caide_2 + apoe_caide_2

```

```

tab sample_caide_2
sum caide_2 if sample_caide_2==1

tab sample_caide_1 sample_caide_2, mis
tab sample

**** 10-year risk ****
capture drop date_exit_10
capture drop dementia_10
gen date_exit_10 = tdatscrn + round(10*365.25)
stset date_exit if sample==1, failure(dementia) id(ID_OUT) origin(tdatscrn) scale(365.25) exit(date_exit_10)
gen dementia_10 = _d==1
tab dementia_10
tab sample_caide_1 dementia_10
*17 dementia cases
tab sample_caide_2 dementia_10
*10 dementia cases

**** 20-year risk ****
capture drop date_exit_20
capture drop dementia_20
gen date_exit_20 = tdatscrn + round(20*365.25)
stset date_exit if sample==1, failure(dementia) id(ID_OUT) origin(tdatscrn) scale(365.25) exit(date_exit_20)
gen dementia_20 = _d==1
tab dementia_20

tab sample_caide_1 dementia_20
*202 dementia cases
tab sample_caide_2 dementia_20
*145 dementia cases

**** TABLE 1 ****

*20-year dementia risk
sum caide_1 caide_2 if sample==1
bysort dementia_20: sum caide_1 caide_2 if sample==1

baselinetable ///
age_s5_full(cts novarlabel afterhead("Age at entry, years")) ///
sex(novarlabel afterhead("Sex")) ///
non_white(novarlabel afterhead("Non-white ethnicity")) ///
caide_1(cts novarlabel afterhead("CAIDE score (clinical version)") ///
caide_2(cts novarlabel afterhead("CAIDE score (APOE supplemented)") ///
if sample==1 ///
, by(dementia_20, total) ctsvar( mean (sd) missing) ///
exportexcel(Table_1_WHII_p5_20y, cell(A6) replace)

*P-values for Table 1
ttest age_s5_full if sample==1, by(dementia_20)
tab sex dementia_20 if sample==1, chi
tab non_white dementia_20 if sample==1, chi
ttest caide_1 if sample==1, by(dementia_20)
ttest caide_2 if sample==1, by(dementia_20)

*** TABLE 5 (equivalent of Table 3 of the UK Biobank analysis) ***

*Different cut-offs

putexcel set "FIGURES_TABLES_output.xlsx", sheet("Table 3 WHII p5") modify

```

```

foreach fu in 10 20 {
foreach score in caide_1 caide_2 age_s5_full {
  if "`score'"=="caide_1" {
    local row 8
    local cut_offs "6 7 8 9 10 11 12"
    local min 0
  }
  if "`score'"=="caide_2" {
    local row 16
    local cut_offs "6 7 8 9 10 11 12 13 14"
    local min 0
  }
  if "`score'"=="age_s5_full" {
    local row 26
    local cut_offs "50 55 60 64 65 66 67 68"
    local min 45
  }
}

if "`fu'"=="20" {
  local row = `row' + 28
}

di ""
di "SCORE: `score'"
di ""
tab `score' if sample_`score'==1
sum age_s5_full if sample_`score'==1
somersd dementia_`fu' `score' if sample_`score'==1, transf(c)
matrix c = r(table)
matrix list c

quietly: putexcel Q`row'=c[1,1], nformat(#.00)
quietly: putexcel R`row'=c[5,1], nformat(#.00)
quietly: putexcel S`row'=c[6,1], nformat(#.00)
local ++row

foreach i in `cut_offs' {
  di ""
  di "Cut `score' at <`i' vs `i'+"
  capture drop `score'_cut
  egen `score'_cut = cut(`score'), at(`min',`i',100)
  tab `score'_cut if sample_`score'==1
  tab dementia_`fu' `score'_cut if sample_`score'==1, matcell(m)
  matrix list m
  quietly: putexcel T`row'=m[2,2], nformat(number)
  quietly: putexcel U`row'=m[2,1], nformat(number)
  quietly: putexcel V`row'=m[1,2], nformat(number)
  quietly: putexcel W`row'=m[1,1], nformat(number)
  tab dementia_`fu' `score'_cut if sample_`score'==1, row
  local ++row
}
}
}

log close

```
