# Supplementary material for: Estimating Dementia Risk Using Multifactorial Prediction Models
Source: PubMed Central journal article supplement (PMC10265307; doi:10.1001/jamanetworkopen.2023.18132), 2023-06-13
Supplement: jamanetwopen-e2318132-s002.pdf [file jamanetwopen-e2318132-s002.pdf]

## Data Sharing Statement

Kivimäki. Estimating Dementia Risk Using Multifactorial Prediction Models. *JAMA Netw Open*. Published June 13, 2023. doi:10.1001/jamanetworkopen.2023.18132

### Data

**Data available:** Yes

**Data types:** Deidentified participant data

**How to access data:** These data are available from UK Biobank:

<https://www.ukbiobank.ac.uk/enable-your-research/apply-for-access>

**When available:** beginning date: 03-01-2023

### Supporting Documents

**Document types:** Statistical/analytic code

**How to access documents:** Statistical code is provided in manuscript supplementary appendix

**When available:** With publication

### Additional Information

**Who can access the data:** For bona fide researchers

**Types of analyses:** For research purposes

**Mechanisms of data availability:** With a signed data access agreement
